# Supplementary material for: Molecular dynamics and NMR reveal the coexistence of H-bond-assisted and through-space JFH coupling in fluorinated amino alcohols
Source: Royal Society of Chemistry journal article supplement (doi:10.1039/d4ob00049h), 2024-01-01
Supplement: d4ob00049h1.pdf [file d4ob00049h1.pdf]

## Molecular dynamics and NMR reveal the coexistence of H-bond-assisted and through-space $J_{FH}$ coupling in fluorinated amino alcohols.

Cassia Chiari,<sup>†a</sup> Patrick Rodrigues Batista,<sup>†a</sup> Renan Vidal Viesser,<sup>b</sup> Leonardo Araujo Schenberg,<sup>c</sup> Lucas C. Ducati,<sup>c</sup> Bruno Linclau<sup>d</sup> and Cláudio F. Tormena<sup>\*a</sup>

<sup>a</sup> Institute of Chemistry, University of Campinas – UNICAMP, P.O. Box 6154, 13083-970, Campinas, São Paulo, Brazil. E-mail: tormena@unicamp.br

<sup>b</sup> Department of Chemistry, University of Houston, Houston, TX 77024, United States.

<sup>c</sup> Department of Fundamental Chemistry, Institute of Chemistry, University of São Paulo, Av. Prof. Lineu Prestes, 748, 05508-000, São Paulo, SP, Brazil.

<sup>d</sup> Department of Organic and Macromolecular Chemistry, Ghent University, Ghent 9000, Belgium.

<sup>†</sup> Authors contributed equally for this publication.

### Electronic Support Information

|                                                                                             |           |
|---------------------------------------------------------------------------------------------|-----------|
| <b>NMR Spectra and HRMS analysis</b>                                                        | <b>2</b>  |
| <i>Compound 1 (trans-2-((2-fluorophenyl)amino)cyclohexan-1-ol)</i>                          | 2         |
| <i>Compound 2 (trans-2-((3-fluoropyridin-4-yl)amino)cyclohexan-1-ol)</i>                    | 13        |
| <i>Compound 3 (trans-2-((perfluoropyridin-4-yl)amino)cyclohexan-1-ol)</i>                   | 20        |
| <b>Computational details – implicit solvation</b>                                           | <b>27</b> |
| <i>Compound 1 (trans-2-((2-fluorophenyl)amino)cyclohexan-1-ol)</i>                          | 29        |
| <i>Compound 2 (trans-2-((3-fluoropyridin-4-yl)amino)cyclohexan-1-ol)</i>                    | 32        |
| <i>Compound 3 (trans-2-((perfluoropyridin-4-yl)amino)cyclohexan-1-ol)</i>                   | 36        |
| <b>Computational details – implicit and explicit solvation</b>                              | <b>40</b> |
| <b>Averaged <math>J</math>-coupling over MD configurations solvated by 3 DMSO molecules</b> | <b>44</b> |
| <i>Compound 1 (trans-2-((2-fluorophenyl)amino)cyclohexan-1-ol)</i>                          | 44        |
| <i>Compound 2 (trans-2-((3-fluoropyridin-4-yl)amino)cyclohexan-1-ol)</i>                    | 46        |
| <i>Compound 3 (trans-2-((perfluoropyridin-4-yl)amino)cyclohexan-1-ol)</i>                   | 47        |

## NMR Spectra

### Compound 1 (*trans*-2-((2-fluorophenyl)amino)cyclohexan-1-ol)

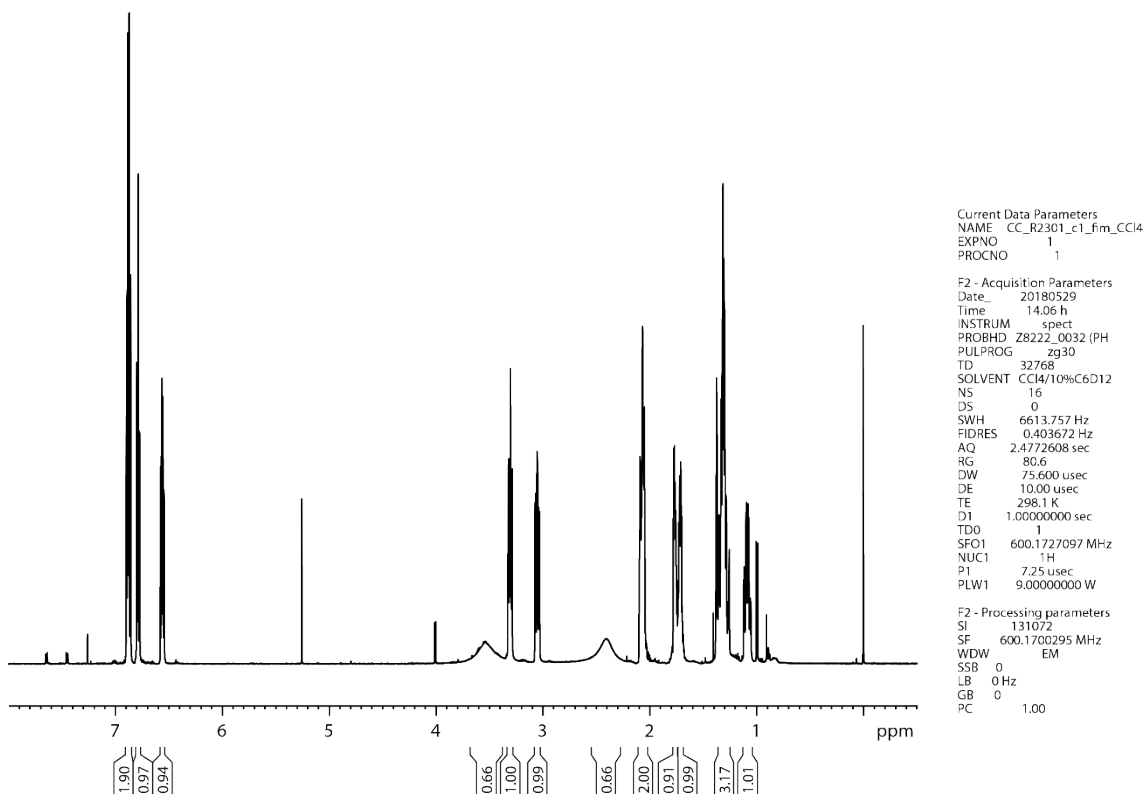

Figure S1. <sup>1</sup>H spectrum for compound 1 in CCl<sub>4</sub>/C<sub>6</sub>D<sub>12</sub>, obtained at 600 MHz.

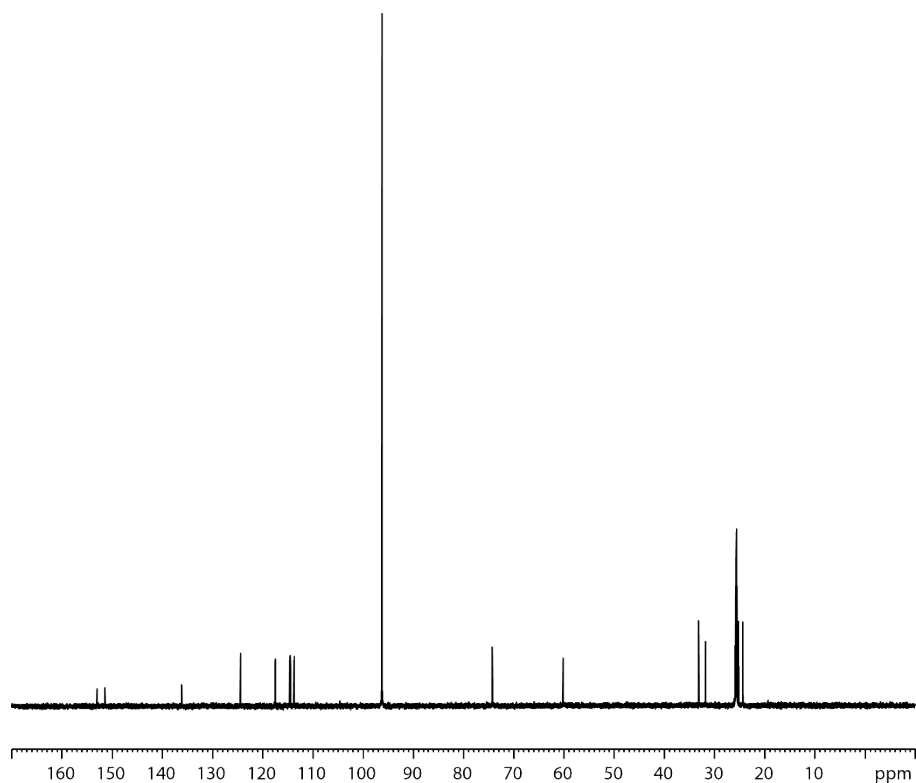

```

Current Data Parameters
NAME  CC_R2301_c1_fim_CCl4
EXPNO  18
PROCNO  1

F2 - Acquisition Parameters
Date_  20180606
Time   10.25 h
INSTRUM  spect
PROBHD  Z8222_0032 (PH
PULPROG  zgpg30
TD       32768
SOLVENT  CCl4/10%C6D12
NS       512
DS       0
SWH      27173.912 Hz
FIDRES   1.658564 Hz
AQ       0.6029312 sec
RG       203
DW       18.400 usec
DE       10.00 usec
TE       298.1 K
D1       2.00000000 sec
D11      0.03000000 sec
TD0      1
SFO1     150.9249400 MHz
NUC1     13C
P1       17.00 usec
PLW1     138.0000000 W
SFO2     600.1724007 MHz
NUC2     1H
CPDPRG2  waltz16
PCPD2    70.00 usec
PLW2     9.00000000 W
PLW12    0.11755000 W
PLW13    0.05912700 W

F2 - Processing parameters
SI       65536
SF       150.9128670 MHz
WDW      EM
SSB      0
LB       1.00 Hz
GB       0
PC       1.40

```

Figure S2.  $^{13}\text{C}$  spectrum for compound 1 in  $\text{CCl}_4/\text{C}_6\text{D}_{12}$ , obtained at 150 MHz.

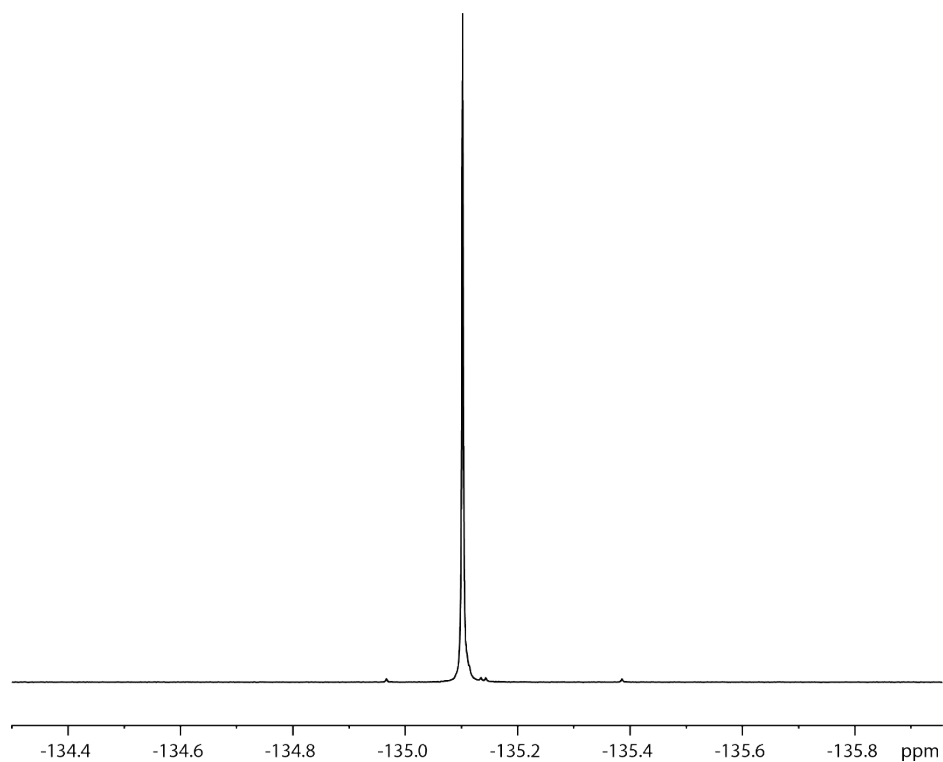

```

Current Data Parameters
NAME  cassia_1H
EXPNO  3
PROCNO  1

F2 - Acquisition Parameters
Date_  20190123
Time   9.19 h
INSTRUM  spect
PROBHD  Z124704_0002 (
PULPROG  zgfhigqn
TD       32768
SOLVENT  DMSO
NS       1
DS       0
SWH      16741.072 Hz
FIDRES   1.021794 Hz
AQ       0.9786710 sec
RG       181
DW       29.867 usec
DE       6.50 usec
TE       298.1 K
D1       1.00000000 sec
D11      0.03000000 sec
D12      0.00002000 sec
TD0      1
SFO1     564.6477114 MHz
NUC1     19F
P1       25.00 usec
PLW1     59.00000000 W
SFO2     600.1737526 MHz
NUC2     1H
CPDPRG2  waltz16
PCPD2    70.00 usec
PLW2     14.89999962 W
PLW12    0.68418002 W

F2 - Processing parameters
SI       32768
SF       564.7240260 MHz
WDW      EM
SSB      0
LB       0.30 Hz
GB       0
PC       1.00

```

Figure S3.  $^{19}\text{F}\{^1\text{H}\}$  spectrum for compound 1 in  $\text{CCl}_4/\text{C}_6\text{D}_{12}$ , obtained at 565 MHz.

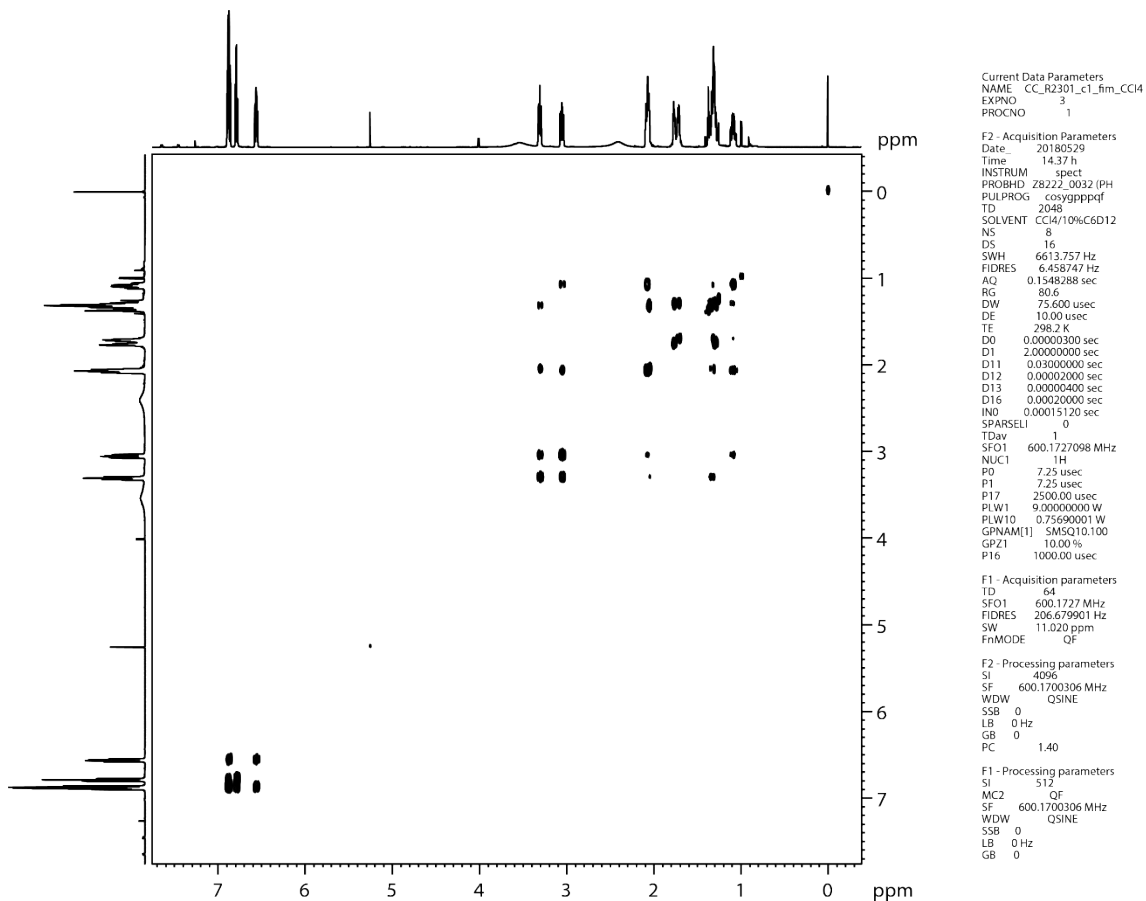

Figure S4.  $^1\text{H}$ - $^1\text{H}$  COSY contour map for compound 1 in  $\text{CCl}_4/\text{C}_6\text{D}_{12}$ , obtained at 600 MHz.

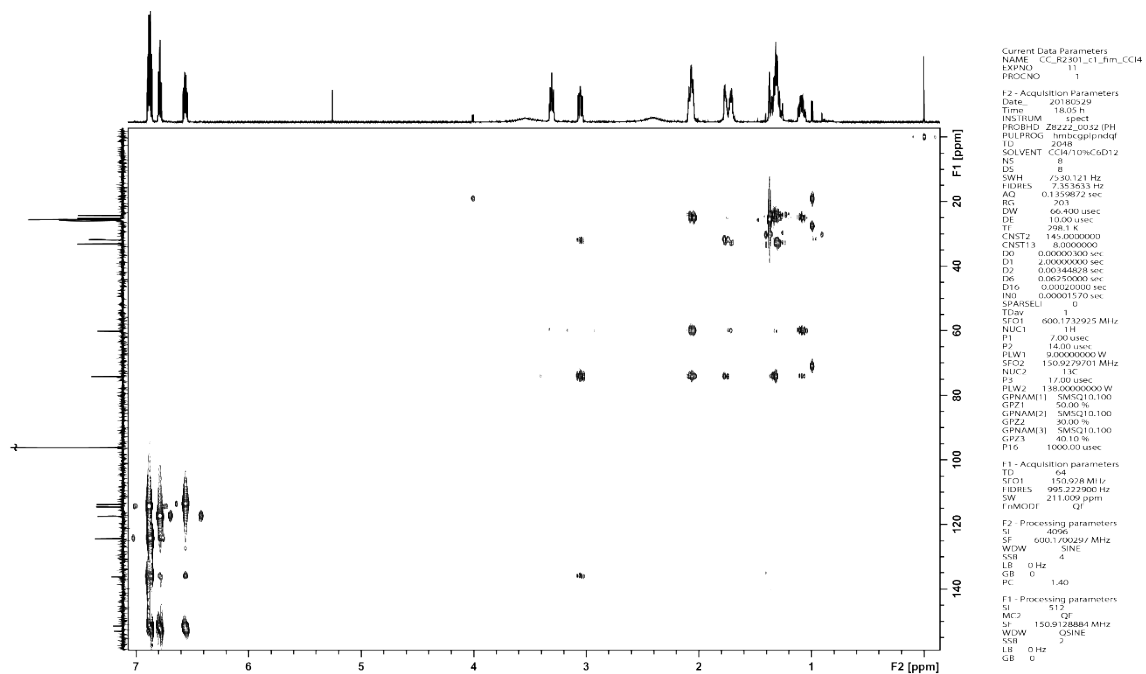

Figure S5.  $^1\text{H}$ - $^{13}\text{C}$  HMBC contour map for compound 1 in  $\text{CCl}_4/\text{C}_6\text{D}_{12}$ , obtained at 600 MHz ( $^1\text{H}$ ).



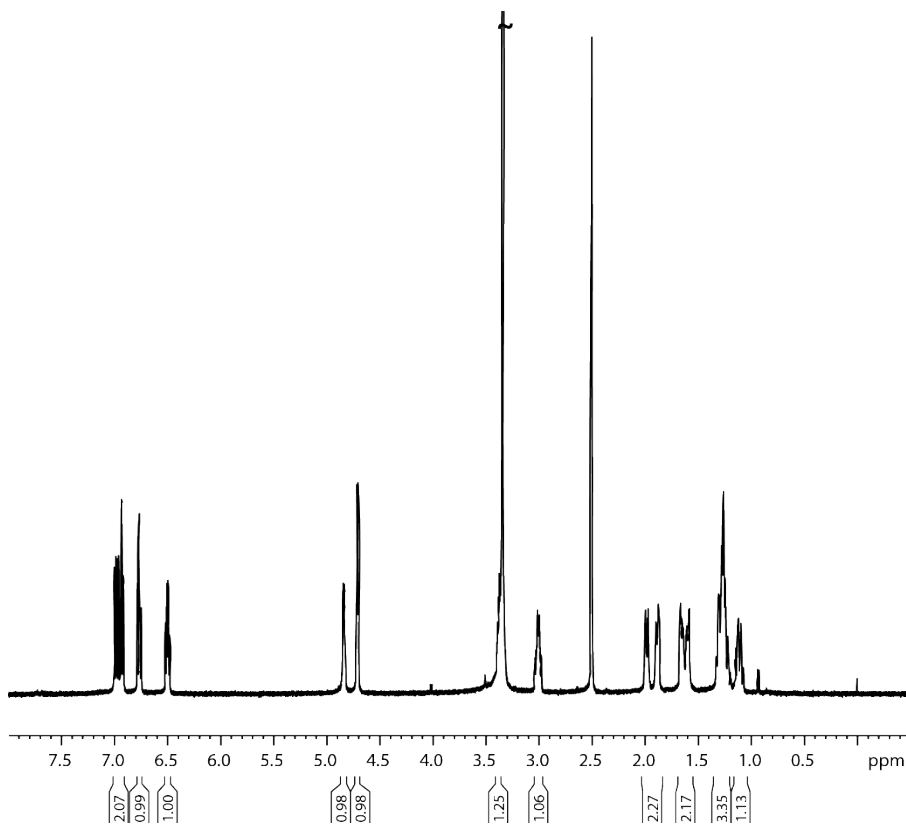

```

Current Data Parameters
NAME CC_r2301_c1_fm_DMSO
EXPNO 1
PROCNO 1

F2 - Acquisition Parameters
Date_ 20180717
Time 16.24 h
INSTRUM spect
PROBHD Z113652 0120 (
PULPROG zg30
TD 65536
SOLVENT DMSO
NS 1
DS 0
SWH 6009.615 Hz
FIDRES 0.183399 Hz
AQ 5.4525952 sec
RG 90.5
DW 83.200 usec
DE 10.00 usec
TE 298.2 K
D1 1.00000000 sec
TD0 1
SFO1 499.8725127 MHz
NUC1 1H
P1 11.75 usec
PLW1 27.00000000 W

F2 - Processing parameters
SI 131072
SF 499.8700032 MHz
WDW EM
SSB 0
LB 0 Hz
GB 0
PC 1.00

```

Figure S8.  $^1\text{H}$  spectrum for compound 1 in  $\text{DMSO-}d_6$ , obtained at 500 MHz.

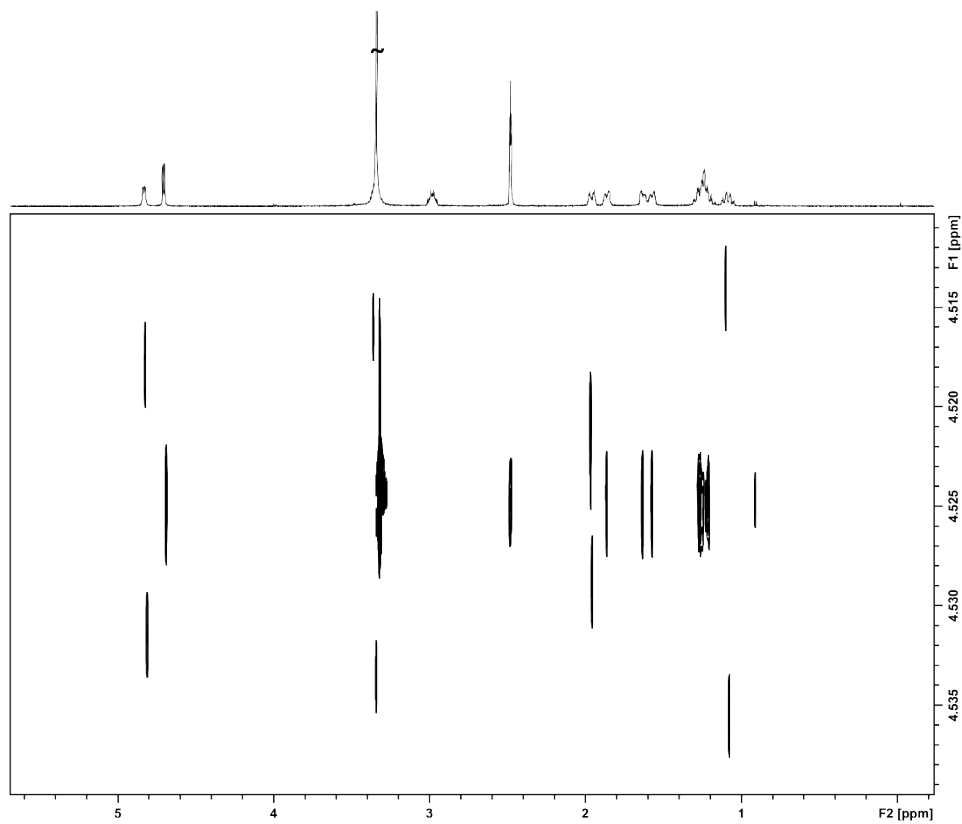

```

Current Data Parameters
NAME CC_r2301_c1_fm_DMSO
EXPNO 1
PROCNO 1

F2 - Acquisition Parameters
Date_ 20180717
Time 16.24 h
INSTRUM spect
PROBHD Z113652 0120 (
PULPROG zg30
TD 65536
SOLVENT DMSO
NS 1
DS 0
SWH 6009.615 Hz
FIDRES 0.183399 Hz
AQ 5.4525952 sec
RG 90.5
DW 83.200 usec
DE 10.00 usec
TE 298.2 K
D1 1.00000000 sec
TD0 1
SFO1 499.8725127 MHz
NUC1 1H
P1 11.75 usec
PLW1 27.00000000 W

F2 - Processing parameters
SI 131072
SF 499.8700032 MHz
WDW EM
SSB 0
LB 0 Hz
GB 0
PC 1.00

F1 - Acquisition parameters
SI 131072
SF 499.8725127 MHz
WDW EM
SSB 0
LB 0 Hz
GB 0
PC 1.00

F1 - Processing parameters
SI 131072
SF 499.8725127 MHz
WDW EM
SSB 0
LB 0 Hz
GB 0
PC 1.00

```

Figure S9. PSYCHEDELIC spectrum in  $\text{DMSO-}d_6$  with selective pulse applied to H2 of compound 1, obtained at 500 MHz ( $^1\text{H}$ ).







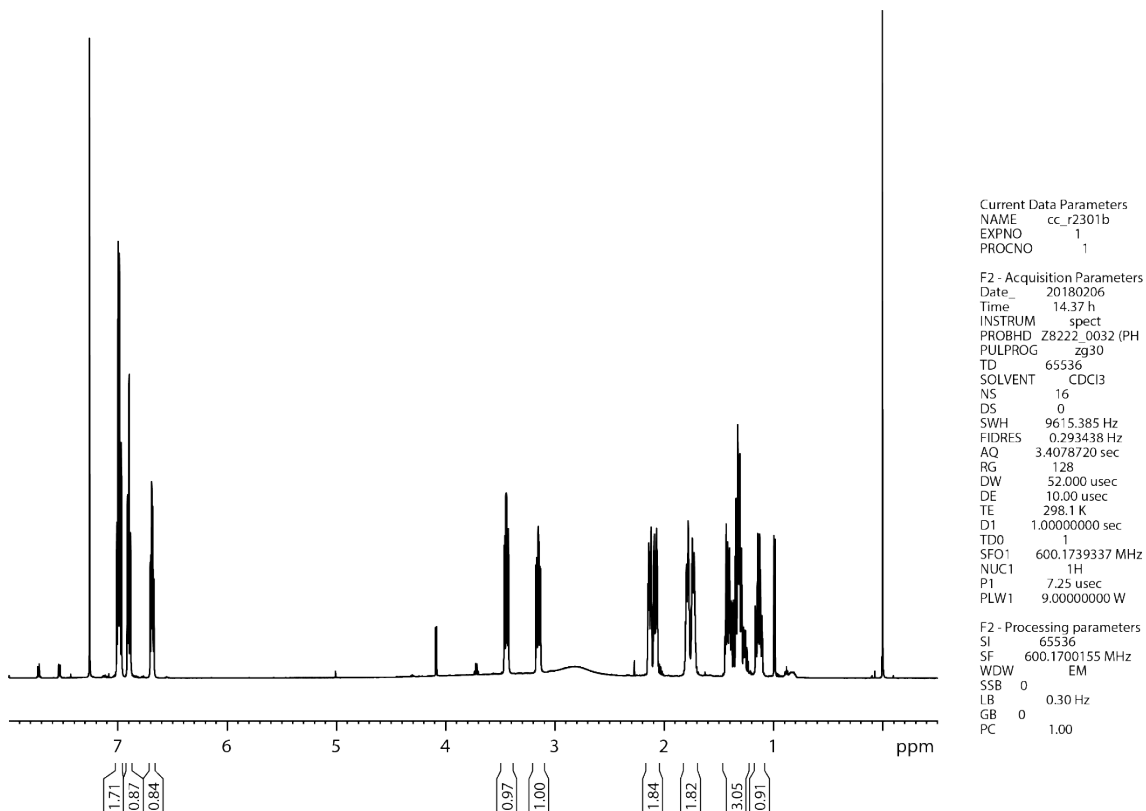

Figure S13.  $^1\text{H}$  spectrum for compound 1 in  $\text{CDCl}_3$ , obtained at 600 MHz.

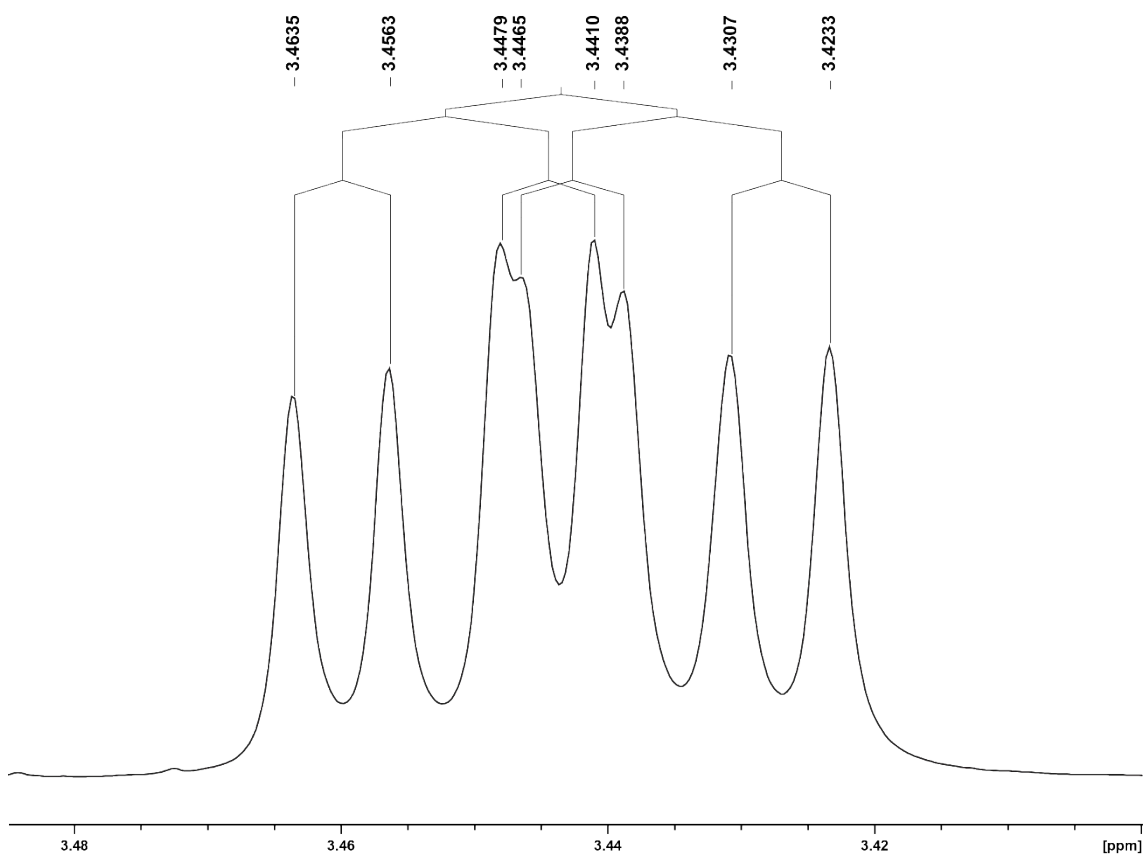

Figure S14. Expansion of  $^1\text{H}$  spectrum for compound 1 in  $\text{CDCl}_3$  in the region of hydrogen H1, obtained at 600 MHz.

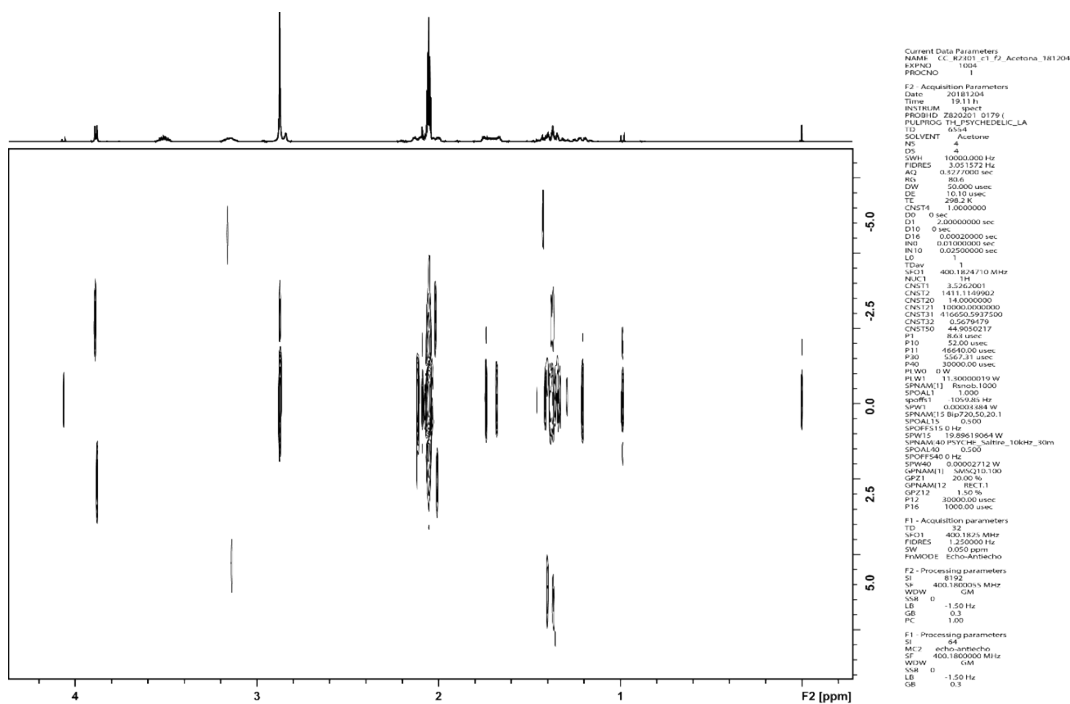

Figure S15. PSYCHEDELIC spectrum in acetone- $d_6$  with selective pulse applied to H1 of compound 1, obtained at 400 MHz ( $^1\text{H}$ ).

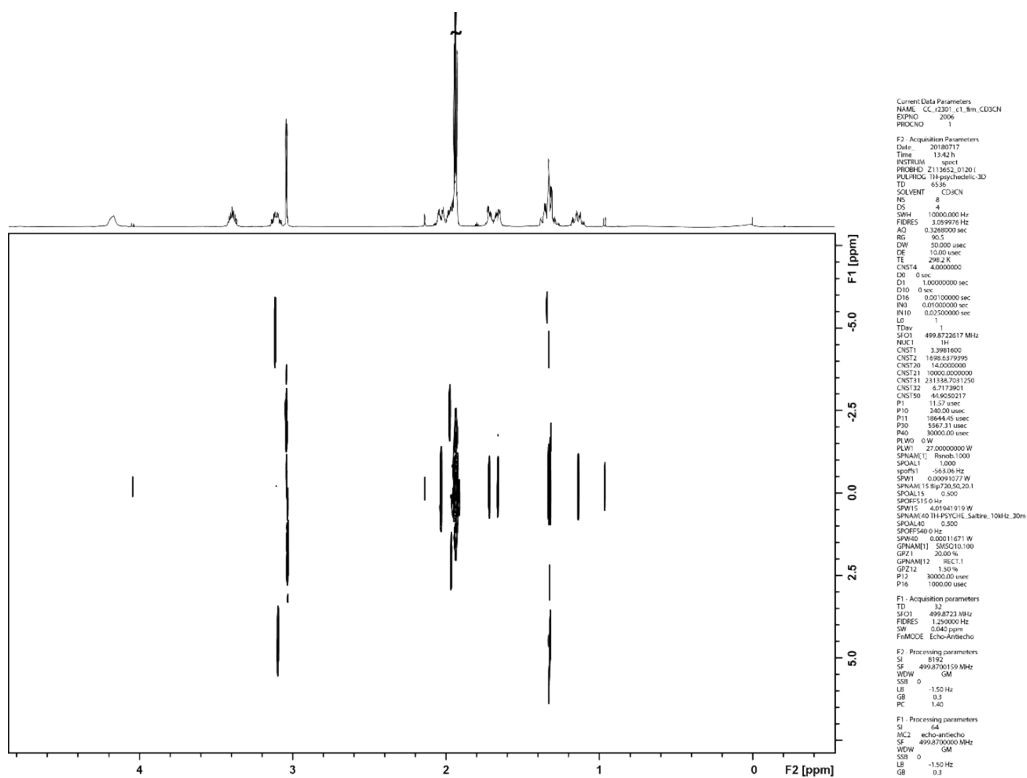

Figure S16. PSYCHEDELIC spectrum in  $\text{CD}_3\text{CN}$  with selective pulse applied to H1 of compound 1, obtained at 500 MHz ( $^1\text{H}$ ).

CC-1 #24-40 RT: 0.1-0.18 AV: 17 NL: 1.08E10  
T: FTMS + p ESI Full ms [50.0000-750.0000]

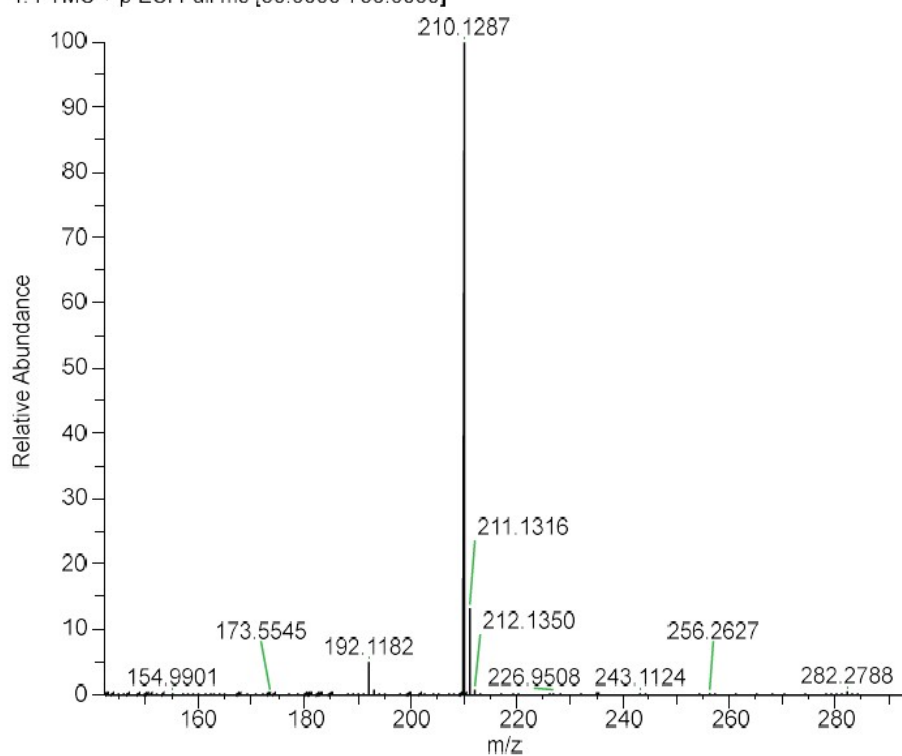

Figure S17. HRMS of compound 1.

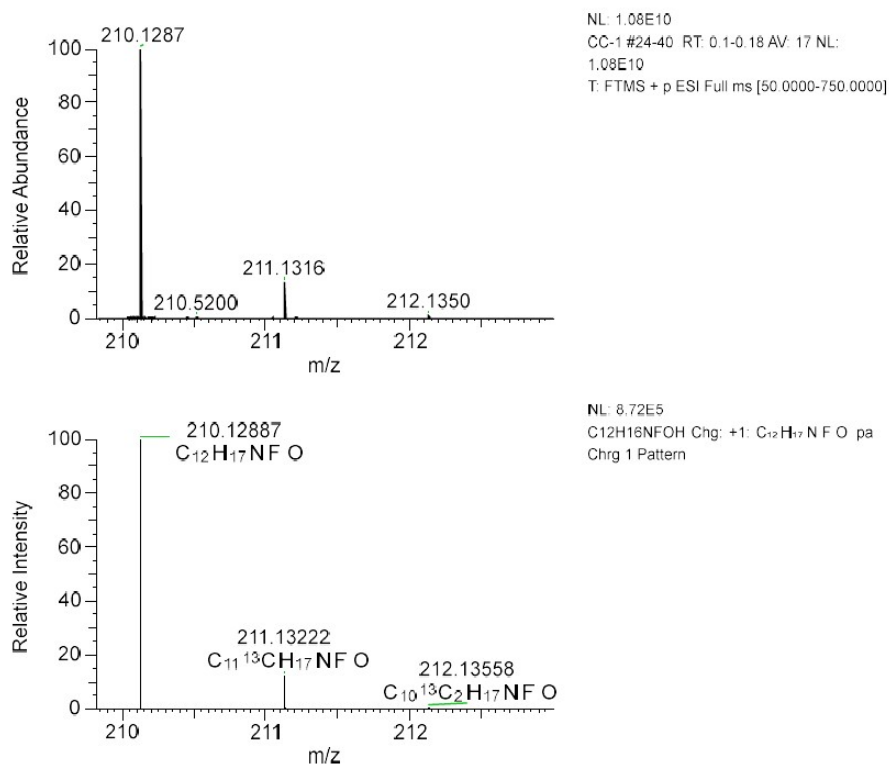

Figure S18. Comparison between experimental (top) and simulated (bottom) for  $C_{12}H_{17}FNO$  [M+H]<sup>+</sup> of compound 1.

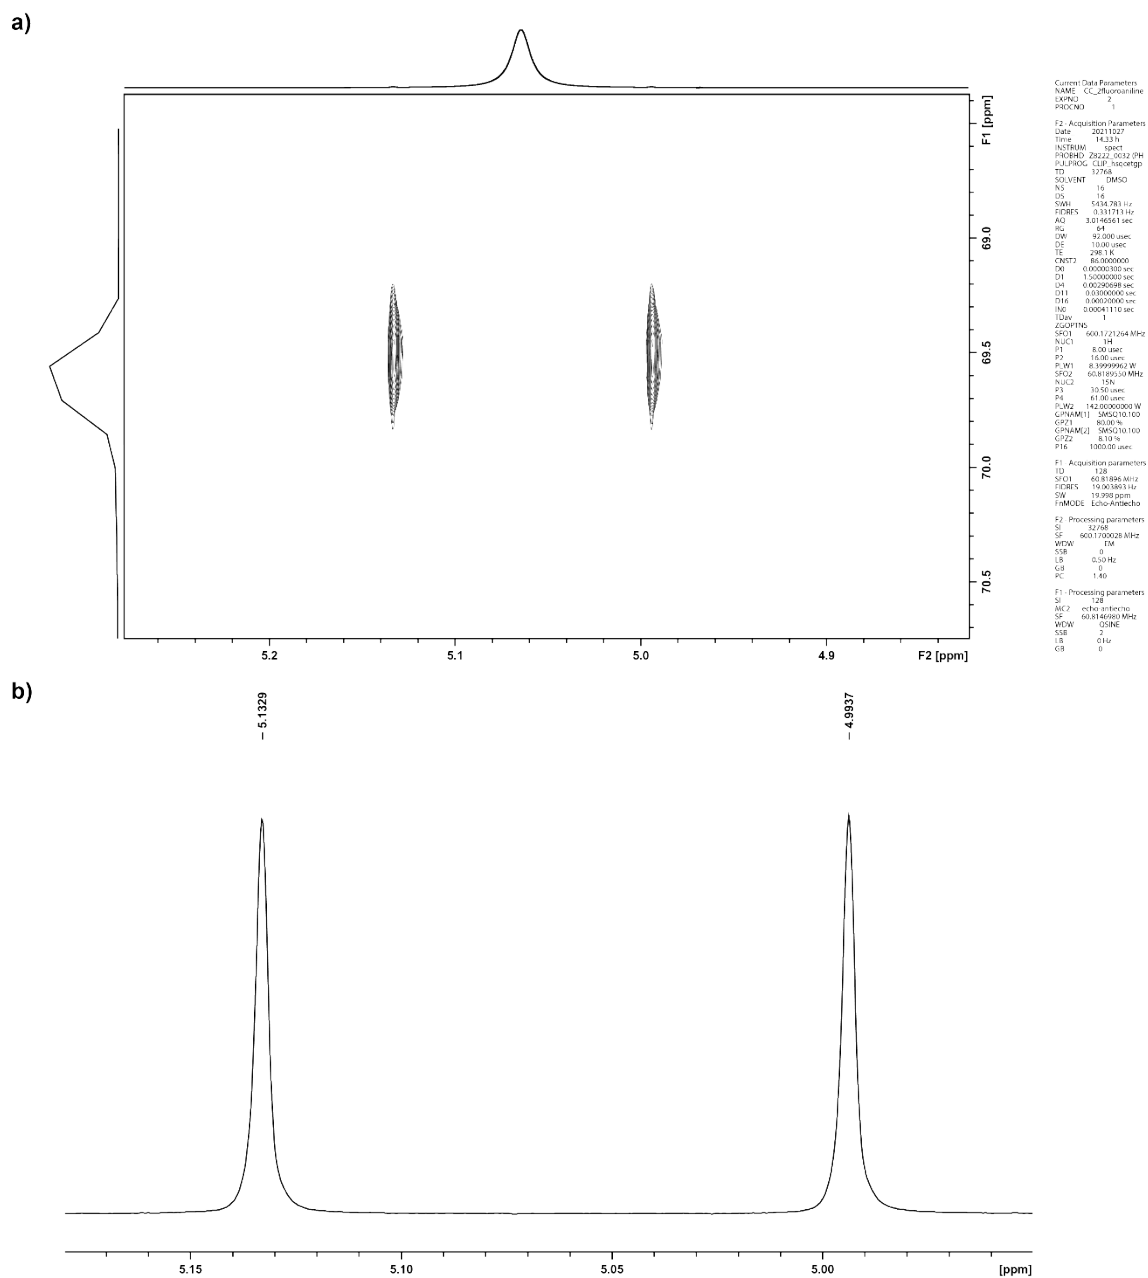

Figure S19.  $^1\text{H}$ - $^{15}\text{N}$  CLIP-HSQC contour map (a) and slice (b) for starting material 2-fluoroaniline in  $\text{DMSO-}d_6$ , obtained at 600 MHz ( $^1\text{H}$ ).

**Compound 2 (*trans*-2-((3-fluoropyridin-4-yl)amino)cyclohexan-1-ol)**

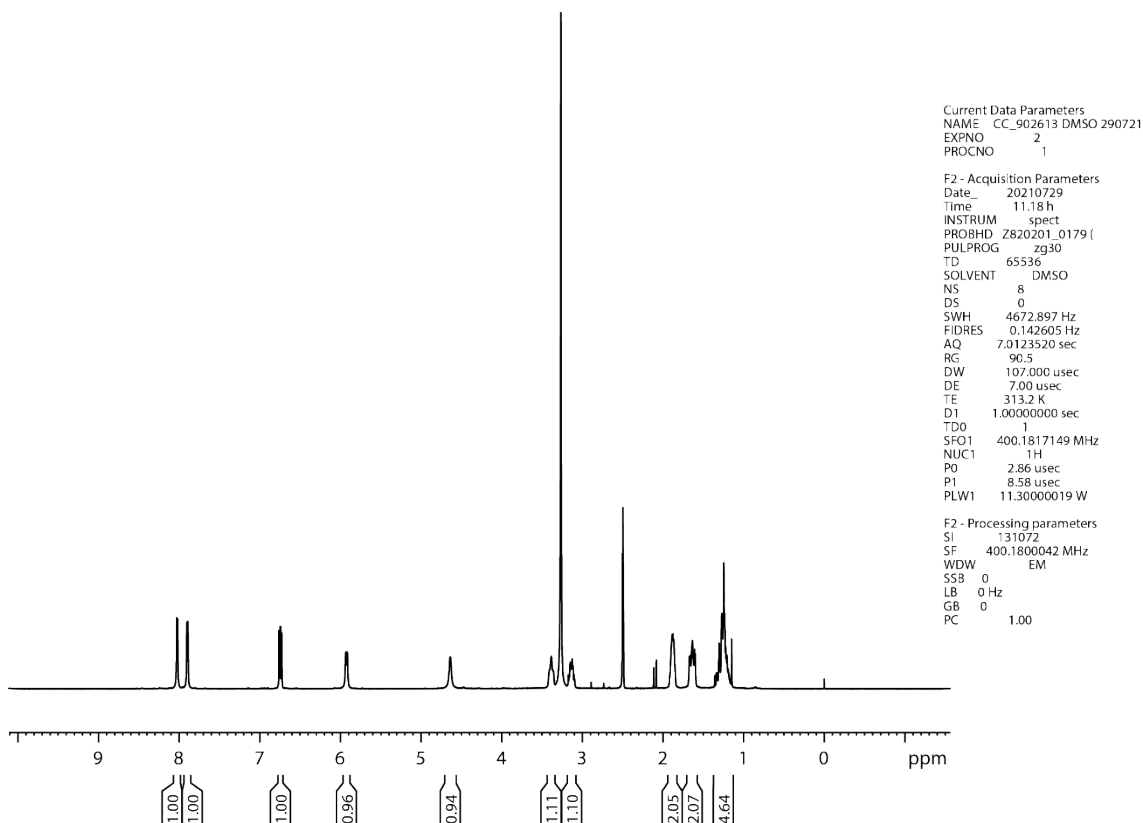

Figure S20. <sup>1</sup>H spectrum for compound 2 in DMSO-*d*<sub>6</sub> at 40 °C, obtained at 400 MHz.

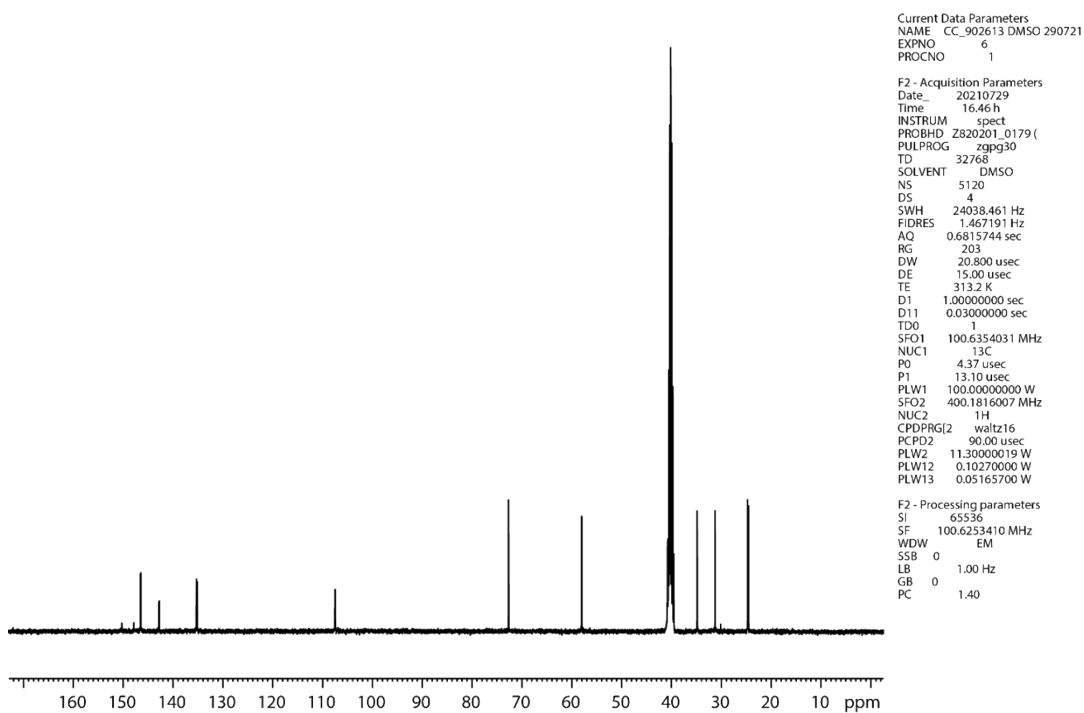

Figure S21. <sup>13</sup>C spectrum for compound 2 in DMSO-*d*<sub>6</sub> at 40 °C, obtained at 100 MHz.

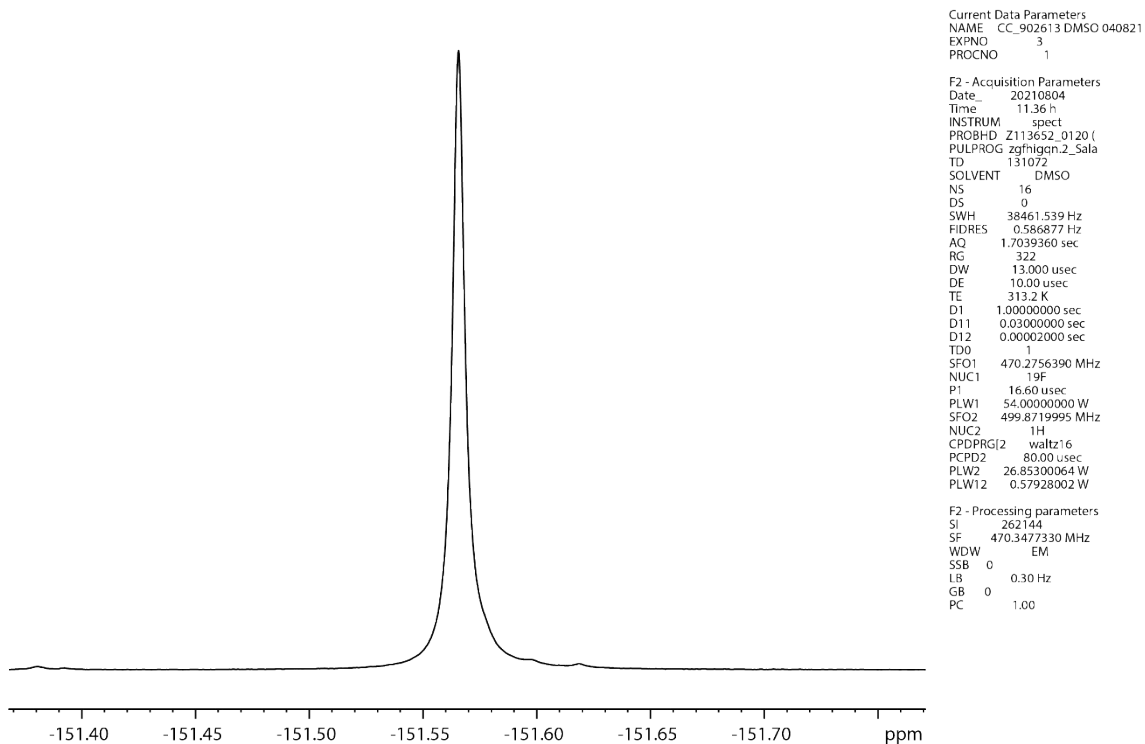

Figure S22.  $^{19}\text{F}\{^1\text{H}\}$  spectrum for compound 2 in  $\text{DMSO-}d_6$  at  $40^\circ\text{C}$ , obtained at 470 MHz.

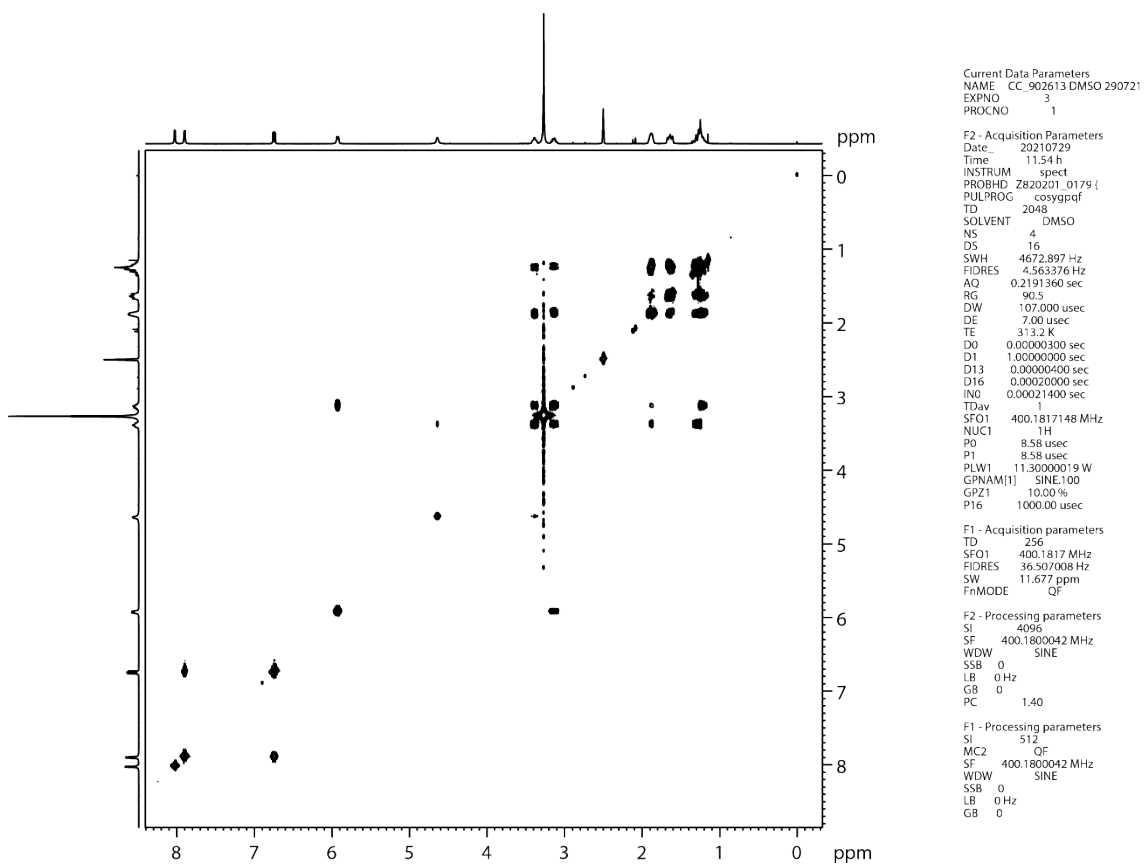

Figure S23.  $^1\text{H-}^1\text{H}$  COSY contour map for compound 2 in  $\text{DMSO-}d_6$  at  $40^\circ\text{C}$ , obtained at 400 MHz.

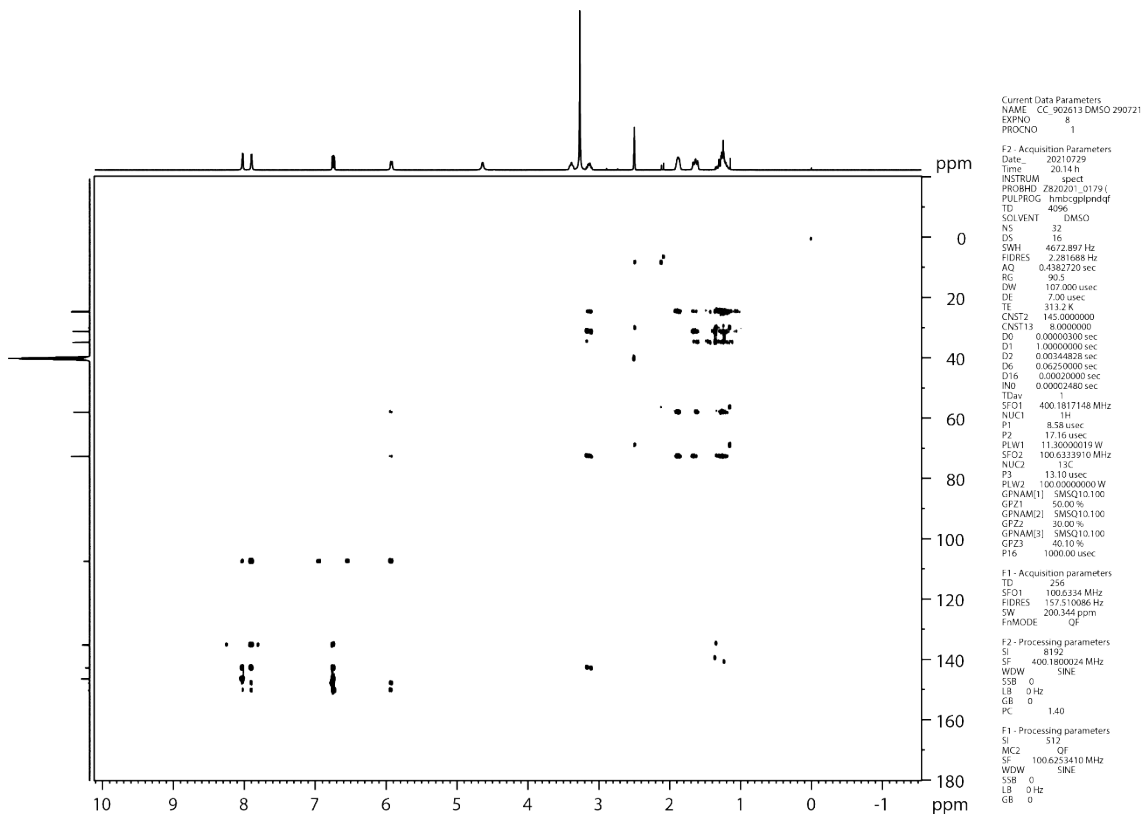

Figure S24.  $^1\text{H}$ - $^{13}\text{C}$  HMBC contour map for compound 2 in  $\text{DMSO}-d_6$  at  $40^\circ\text{C}$ , obtained at 400 MHz ( $^1\text{H}$ ).

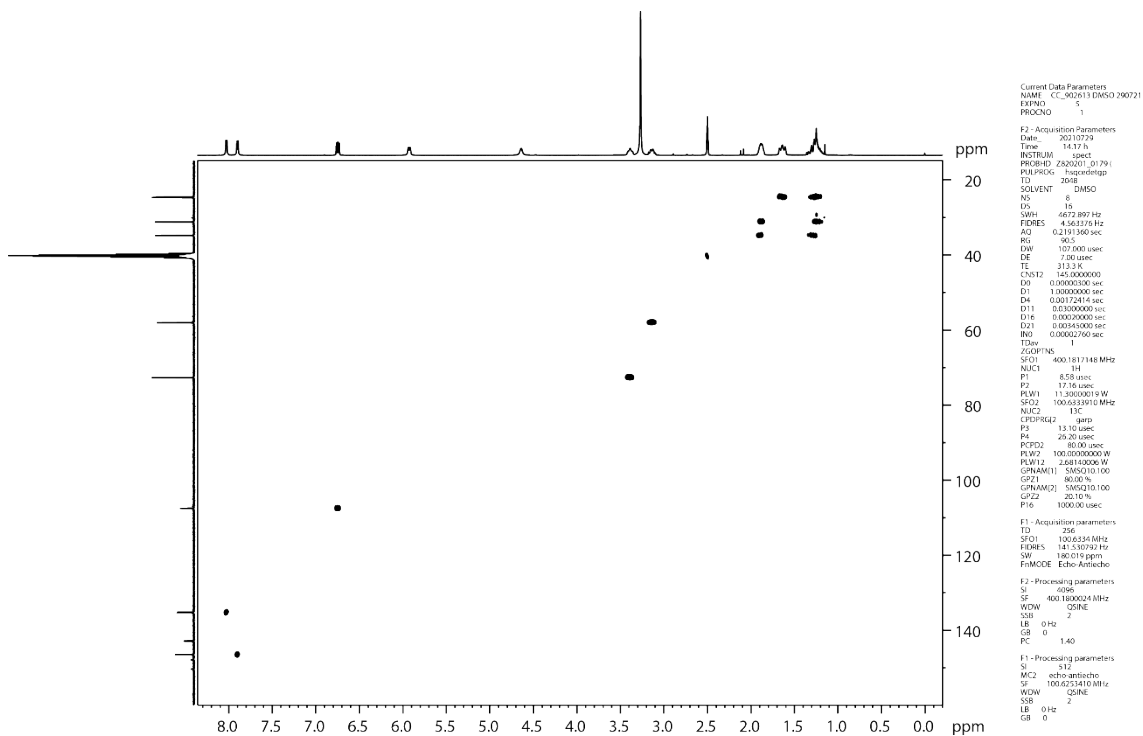

Figure S25.  $^1\text{H}$ - $^{13}\text{C}$  HSQC contour map for compound 2 in  $\text{DMSO}-d_6$  at  $40^\circ\text{C}$ , obtained at 400 MHz ( $^1\text{H}$ ).

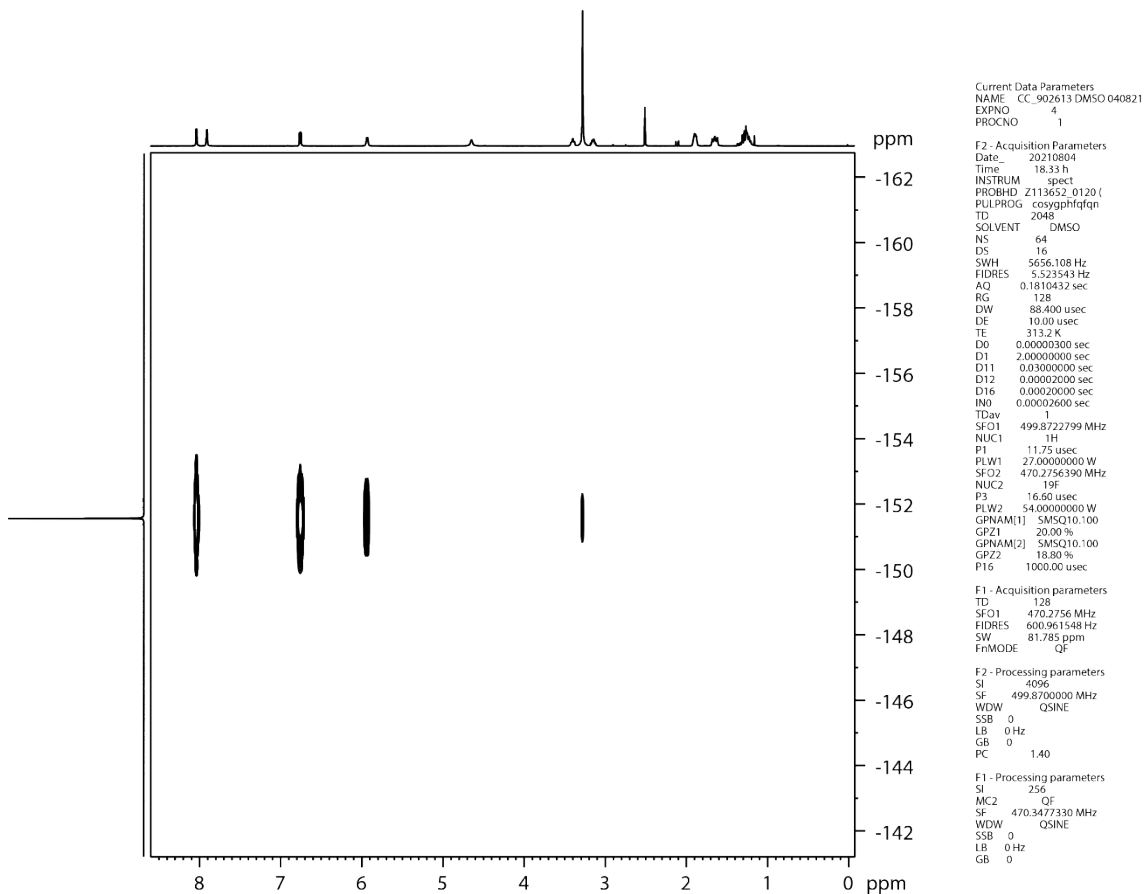

Figure S26.  $^1\text{H}$ - $^{19}\text{F}$  COSY contour map for compound 2 in  $\text{DMSO-}d_6$  at  $40^\circ\text{C}$ , obtained at 500 MHz ( $^1\text{H}$ ).

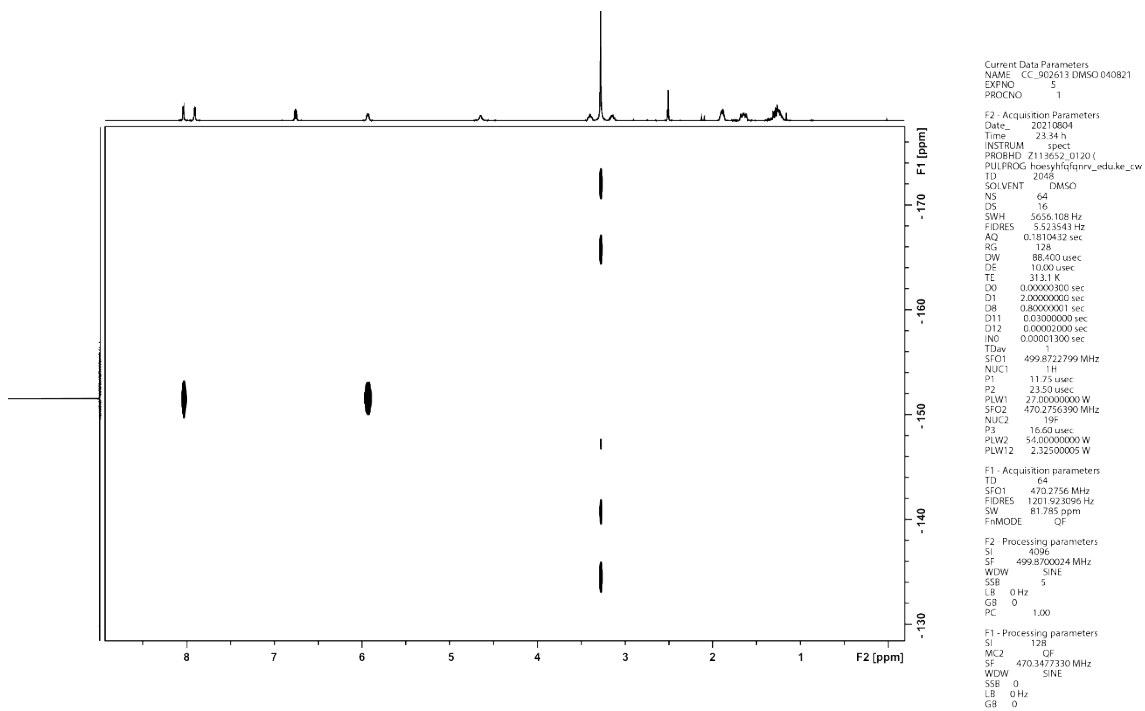

Figure S27.  $^1\text{H}$ - $^{19}\text{F}$  HOESY contour map for compound 2 in  $\text{DMSO-}d_6$  at  $40^\circ\text{C}$ , obtained at 500 MHz ( $^1\text{H}$ ).



a)

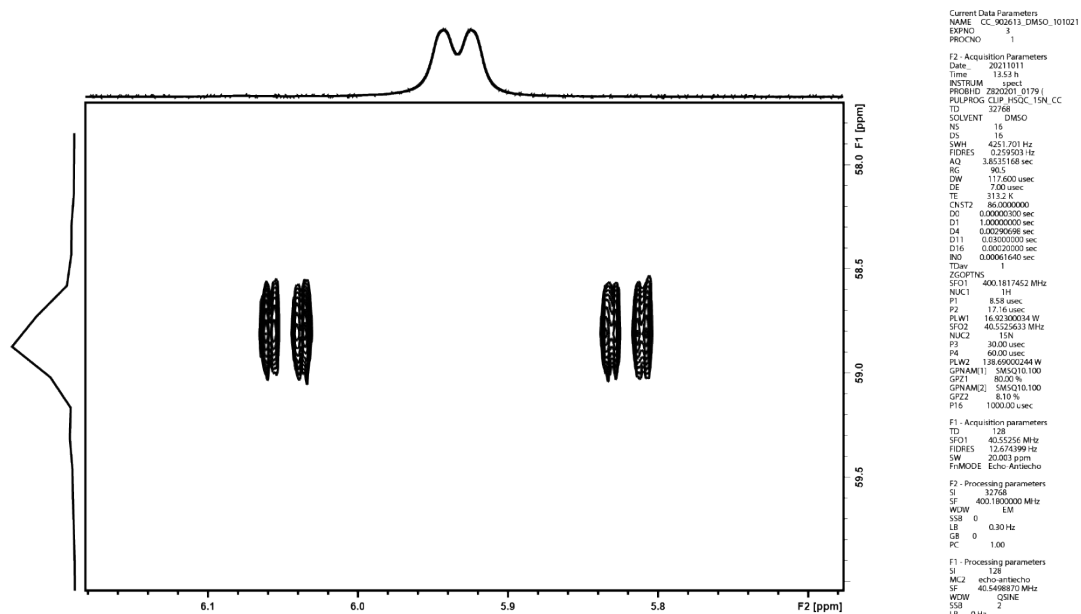

```

Current Data Parameters
NAME      CC_902613_DMSO_101021
EXPNO    3
PROCNO   1

F2 - Acquisition Parameters
Date_    20211011
Time     13.53 h
INSTRUM  spect
PROBHD   ZB20201_0179 |
PULPROG  CLIP_HSQC_15N_CC
TD       27268
SOLVENT  DMSO
NS       16
DS       16
SWH      6251.701 Hz
FIDRES   0.219903 Hz
AQ       3.853168 sec
RG       90.5
DM       177.500 usec
DE       7.00 usec
TE       313.2 K
CH12     86.0000000
D0       0.0000000 sec
D1       1.0000000 sec
D4       0.00290696 sec
D11      0.03000000 sec
D16      0.00020000 sec
INDO     0.00061646 sec
TD0av    1
ZSOPFNS
SFO1     400.1817452 MHz
NUC1     15N
P1       8.58 usec
P2       17.16 usec
PLW1     16.9230034 W
SFO2     40.5225633 MHz
NUC2     15N
P3       30.00 usec
P4       60.00 usec
PLW2     1.886000244 W
GRNAM1T1 5MS5210.100
GFZ1     80.00 %
GRNAM2C1 5MS5210.100
GFZ2     8.10 %
P16     1000.00 usec

F1 - Acquisition parameters
TD       128
SFO1     40.52256 MHz
FIDRES   12.674399 Hz
SW       2000.3 ppm
FRMMODE  Echo-Antiecho

F2 - Processing parameters
SI       32768
SF       400.1800000 MHz
WDW      EM
SSB      0
LB       0.30 Hz
GB       0
PC       1.00

F1 - Processing parameters
SI       128
MC2      echo-antiecho
SF       40.5498870 MHz
WDW      CBINE
SSB      2
LB       0 Hz
GB       0
  
```

b)

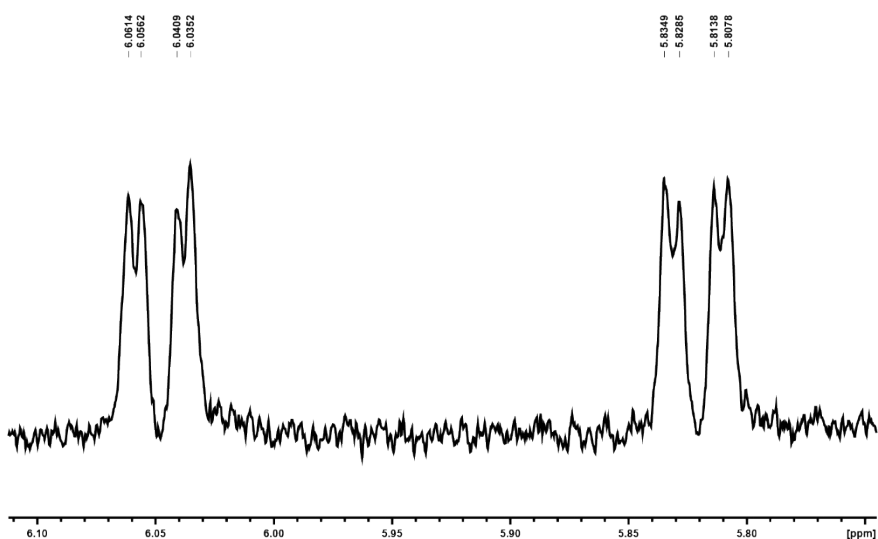

- 6.0514  
 - 6.0562  
 - 6.0409  
 - 6.0352  
  
 - 5.8349  
 - 5.8285  
 - 5.8138  
 - 5.8078

Figure S28.  $^1\text{H}$ - $^{15}\text{N}$  CLIP-HSQC contour map (a) and slice (b) for compound 2 in  $\text{DMSO-}d_6$  at  $40^\circ\text{C}$ , obtained at 400 MHz ( $^1\text{H}$ ).

CC-2 #24-37 RT: 0.11-0.16 AV: 14 NL: 1.08E10  
T: FTMS + p ESI Full ms [50.0000-750.0000]

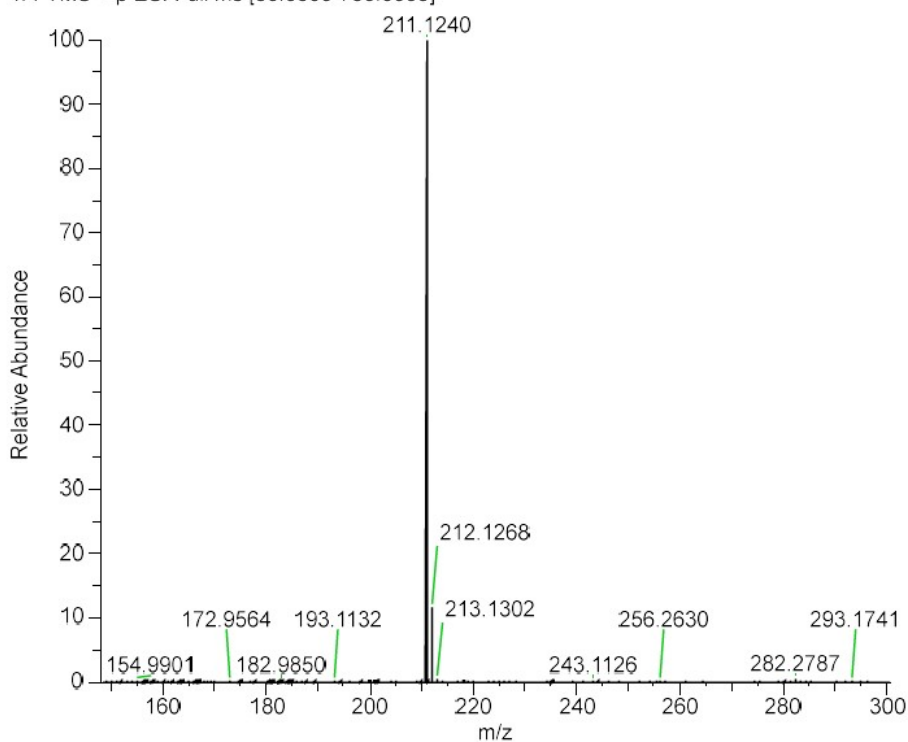

Figure S29. HRMS of compound 2.

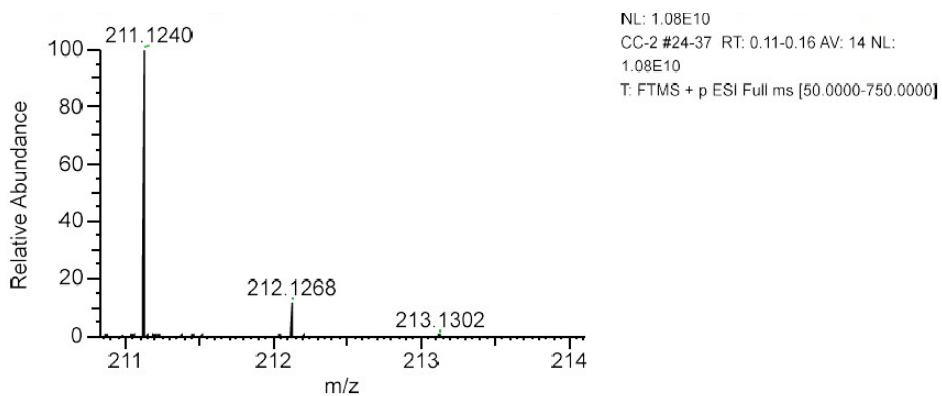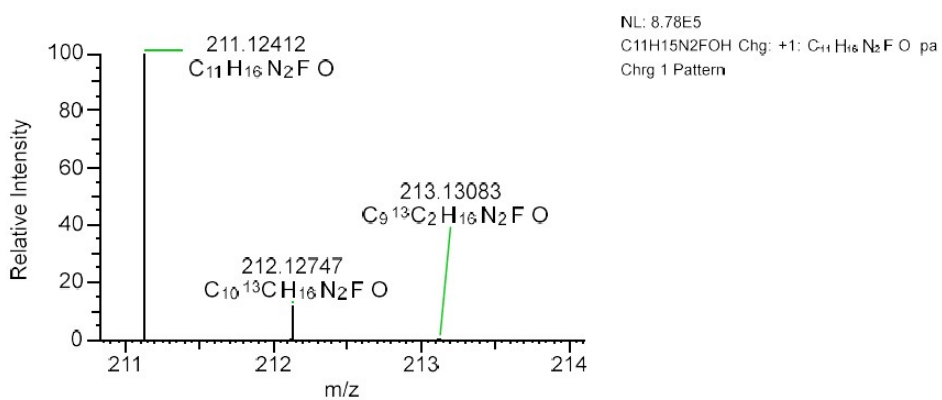

Figure S30. Comparison between experimental (top) and simulated (bottom) for  $C_{11}H_{16}FN_2O$   $[M+H]^+$  of compound 2.

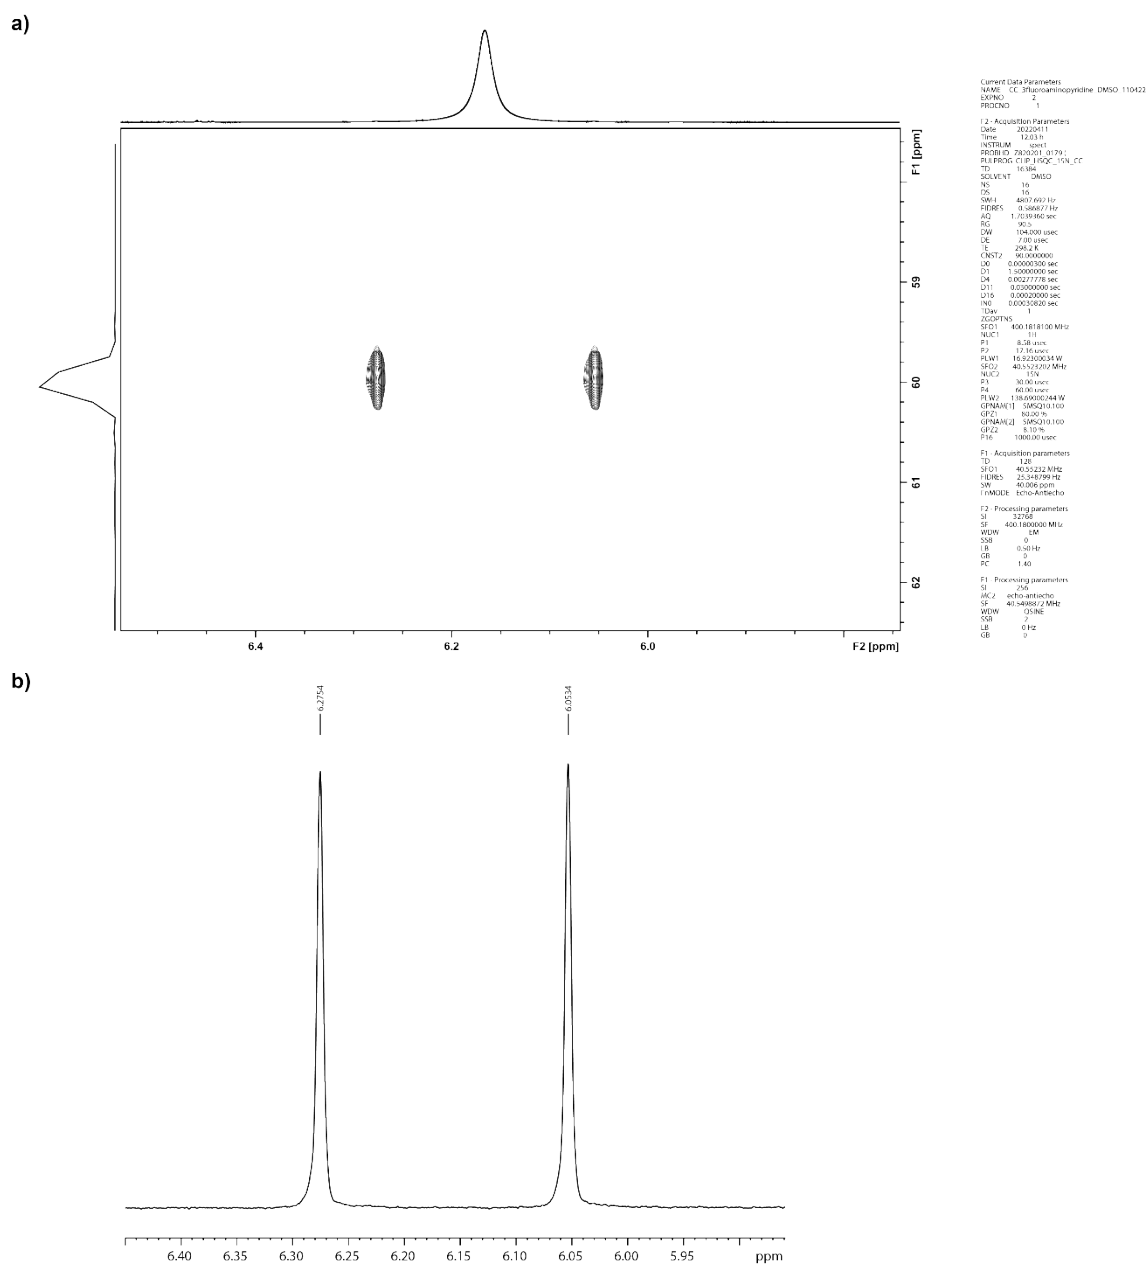

Figure S31.  $^1\text{H}$ - $^{15}\text{N}$  CLIP-HSQC contour map (a) and slice (b) for starting material 3-fluoro-4-aminopyridine in  $\text{DMSO-}d_6$ , obtained at 400 MHz ( $^1\text{H}$ ).

**Compound 3 (*trans*-2-((perfluoropyridin-4-yl)amino)cyclohexan-1-ol)**

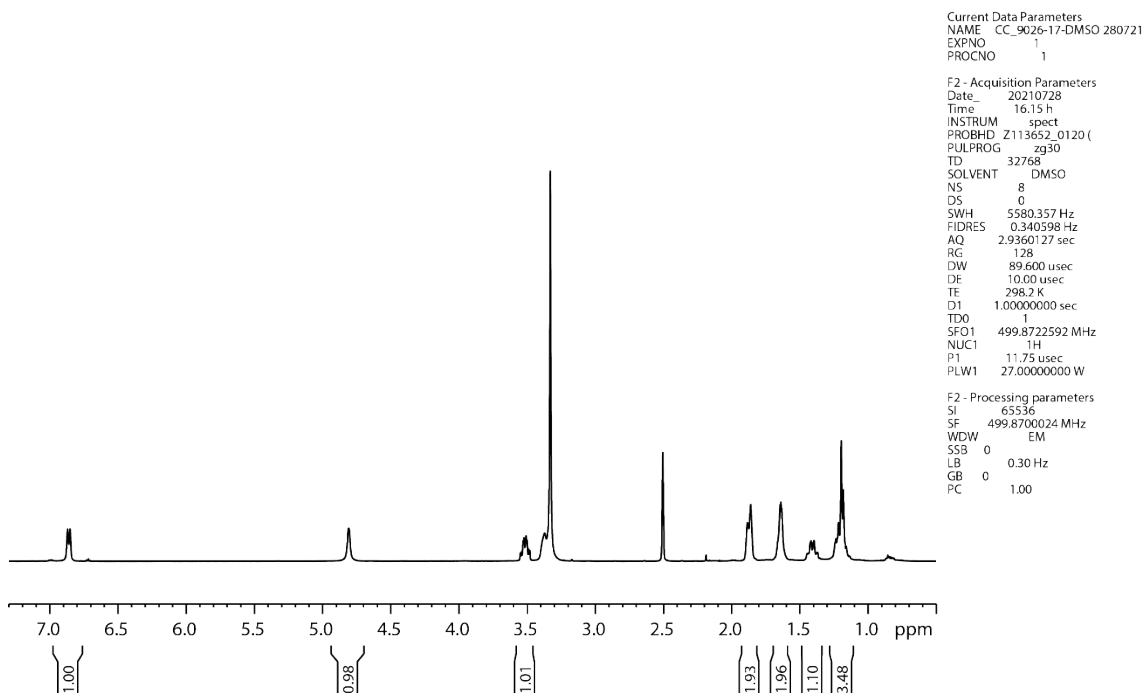

Figure S32. <sup>1</sup>H spectrum for compound 3 in DMSO-*d*<sub>6</sub>, obtained at 500 MHz.

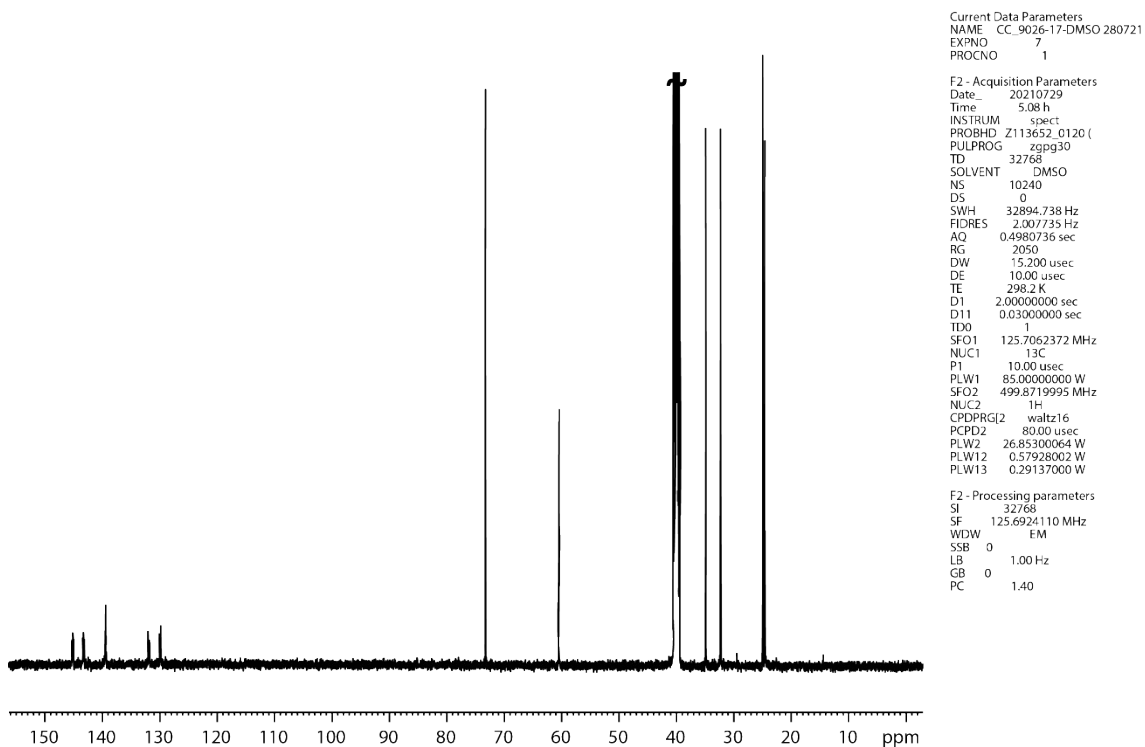

Figure S33. <sup>13</sup>C spectrum for compound 3 in DMSO-*d*<sub>6</sub>, obtained at 125 MHz.

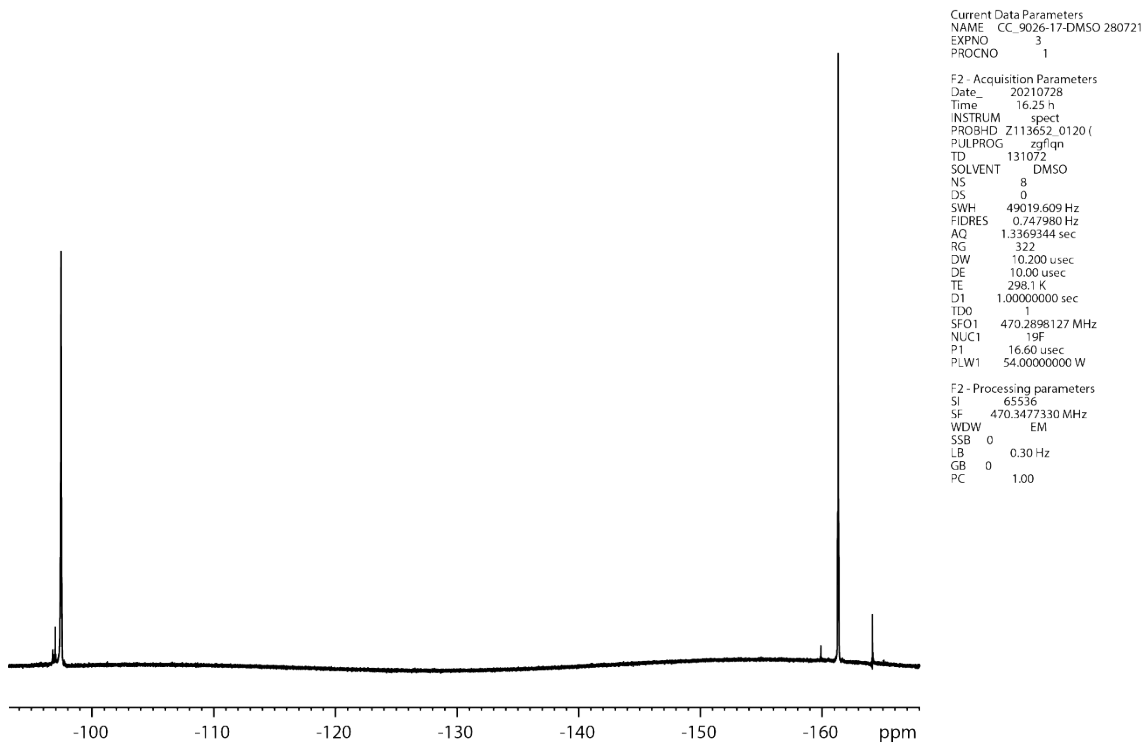

Figure S34.  $^{19}\text{F}\{^1\text{H}\}$  spectrum for compound 3 in  $\text{DMSO-}d_6$ , obtained at 470 MHz.

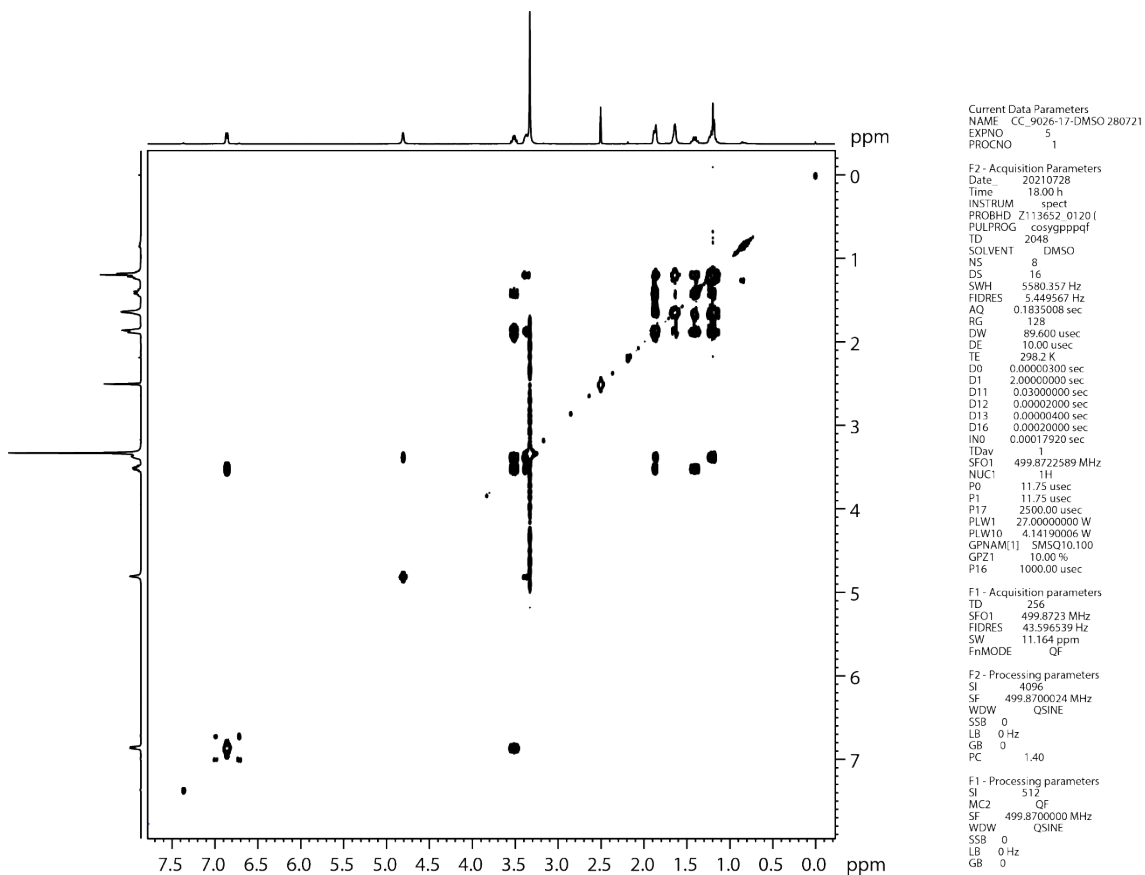

Figure S35.  $^1\text{H-}^1\text{H}$  COSY contour map for compound 3 in  $\text{DMSO-}d_6$ , obtained at 500 MHz.

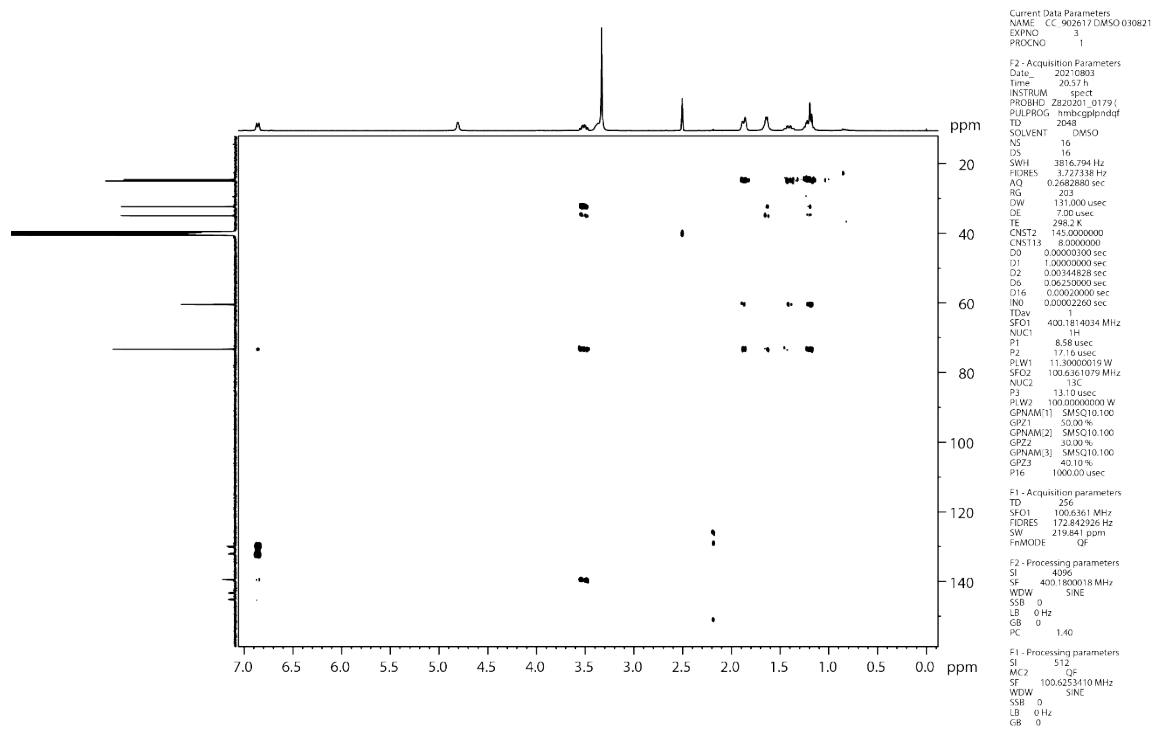

Figure S36.  $^1\text{H}$ - $^{13}\text{C}$  HMBC contour map for compound 3 in  $\text{DMSO-}d_6$ , obtained at 400 MHz ( $^1\text{H}$ ).

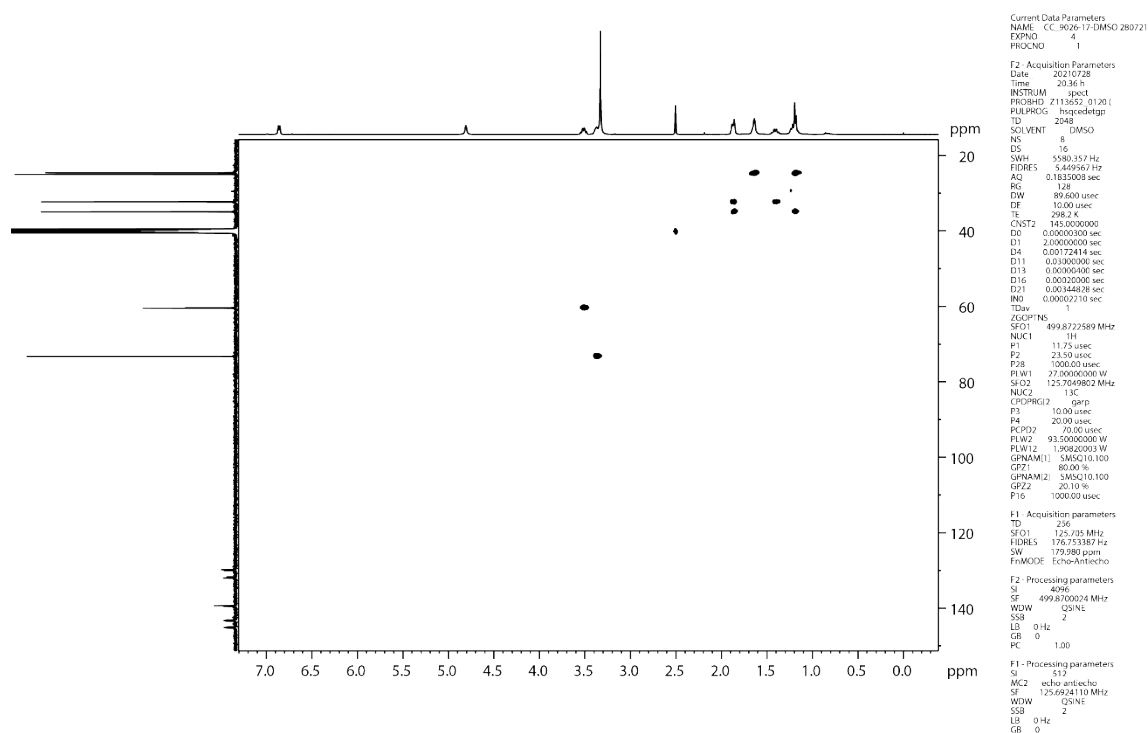

Figure S37.  $^1\text{H}$ - $^{13}\text{C}$  HSQC contour map for compound 3 in  $\text{DMSO-}d_6$ , obtained at 500 MHz ( $^1\text{H}$ ).

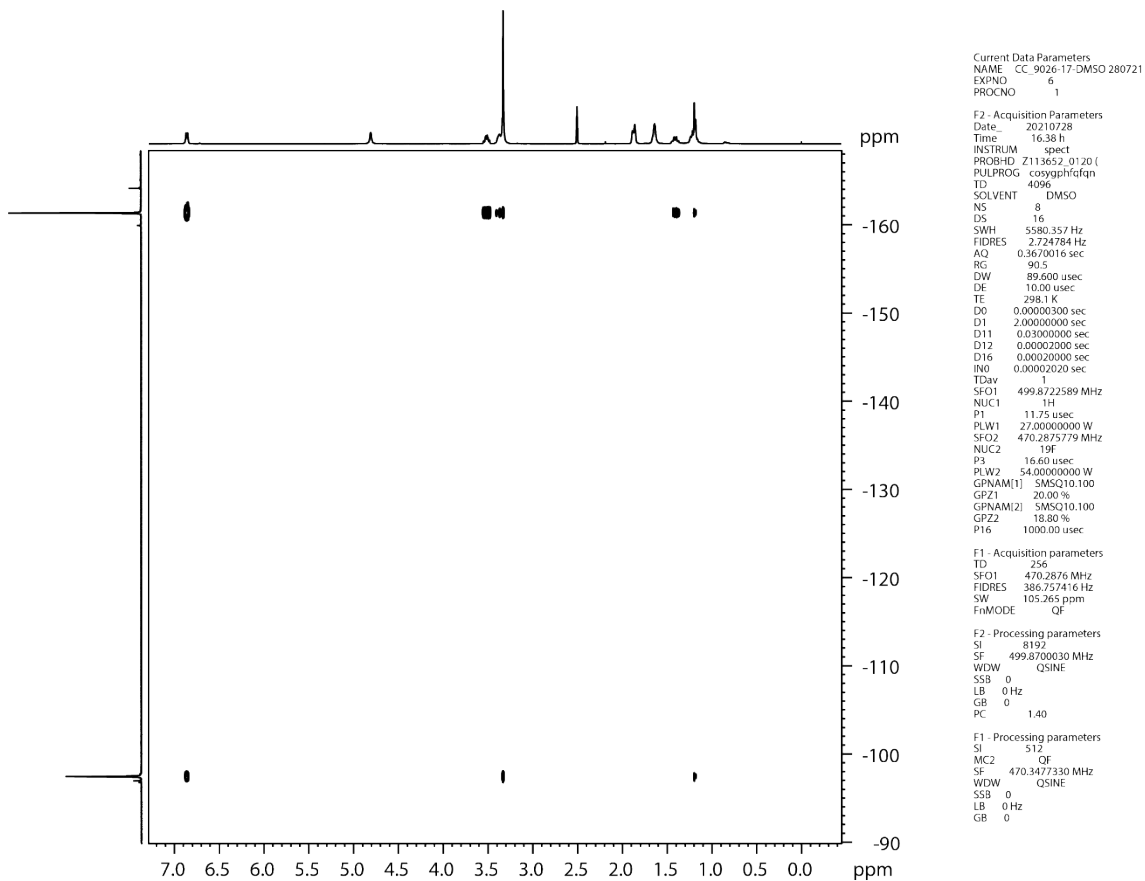

Figure S38.  $^1\text{H}$ - $^{19}\text{F}$  COSY contour map for compound 3 in  $\text{DMSO-}d_6$ , obtained at 500 MHz ( $^1\text{H}$ ).

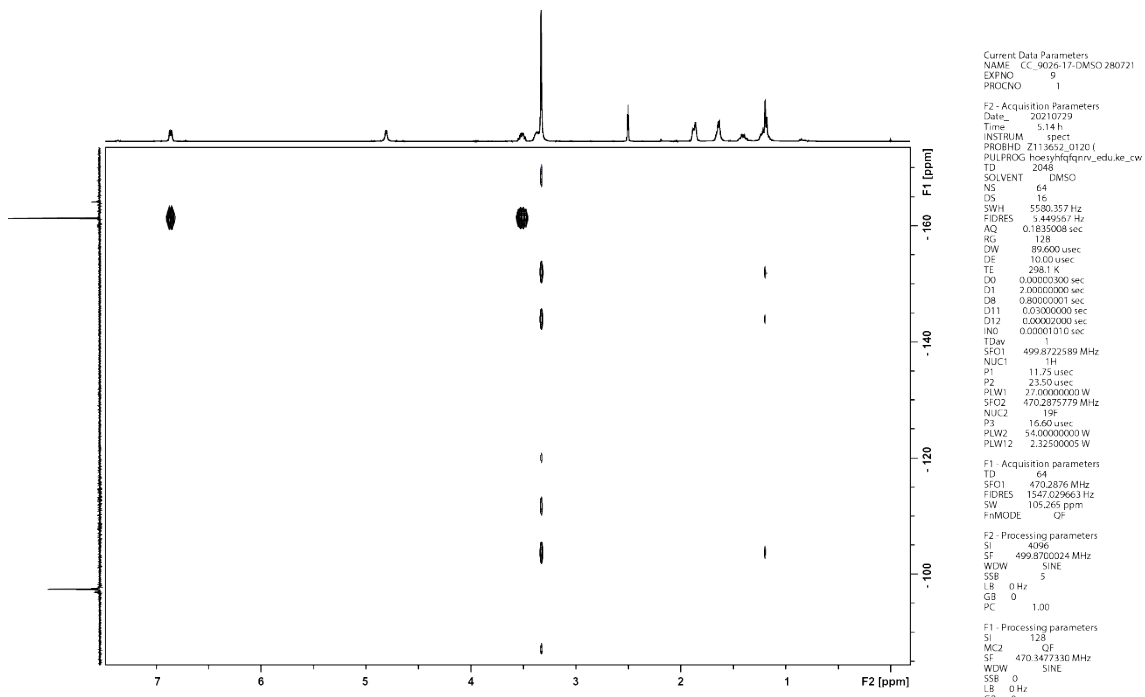

Figure S39.  $^1\text{H}$ - $^{19}\text{F}$  HOESY contour map for compound 3 in  $\text{DMSO-}d_6$ , obtained at 500 MHz ( $^1\text{H}$ ).

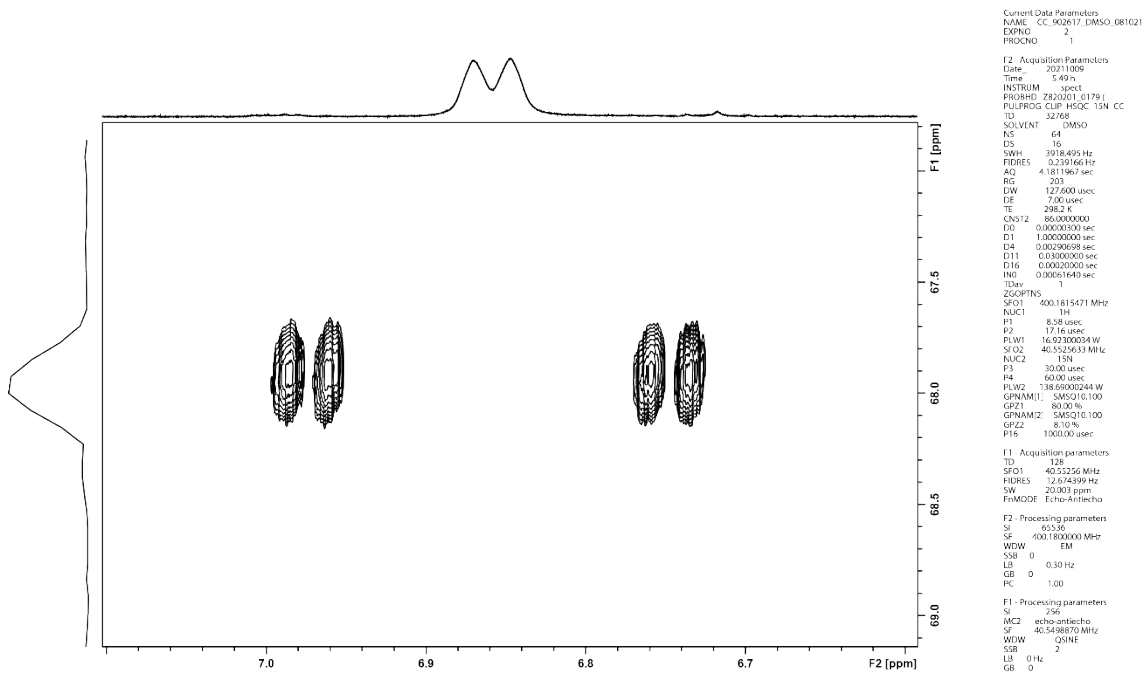

Figure S40.  $^1\text{H}$ - $^{15}\text{N}$  CLIP-HSQC contour map for compound 3 in  $\text{DMSO-}d_6$ , obtained at 400 MHz ( $^1\text{H}$ ).



CC-3 #28-35 RT: 0.12-0.15 AV: 8 NL: 2.24E8  
T: FTMS + p ESI Full ms [50.0000-750.0000]

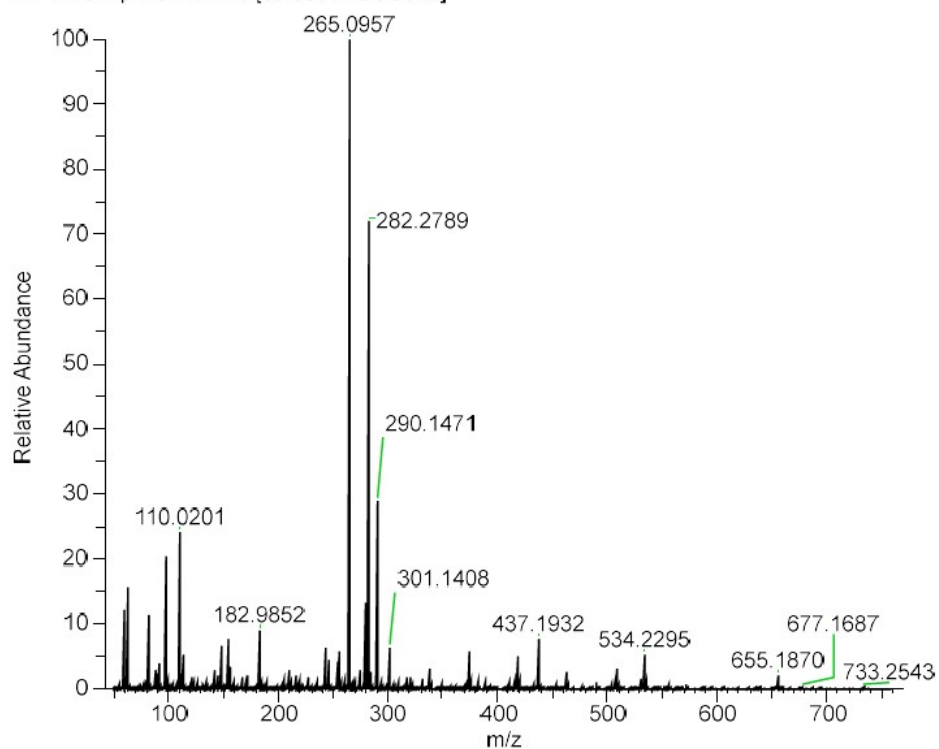

Figure S41. HRMS of compound 3.

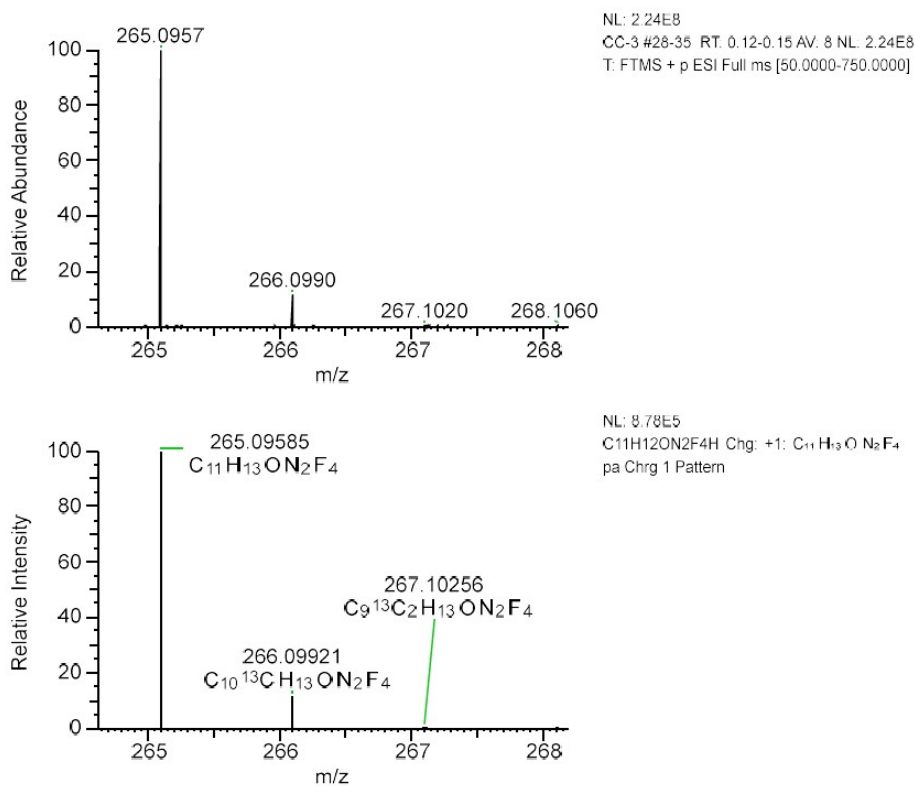

Figure S42. Comparison between experimental (top) and simulated (bottom) for  $C_{11}H_{13}F_4N_2O$  [M+H]<sup>+</sup> of compound 3.

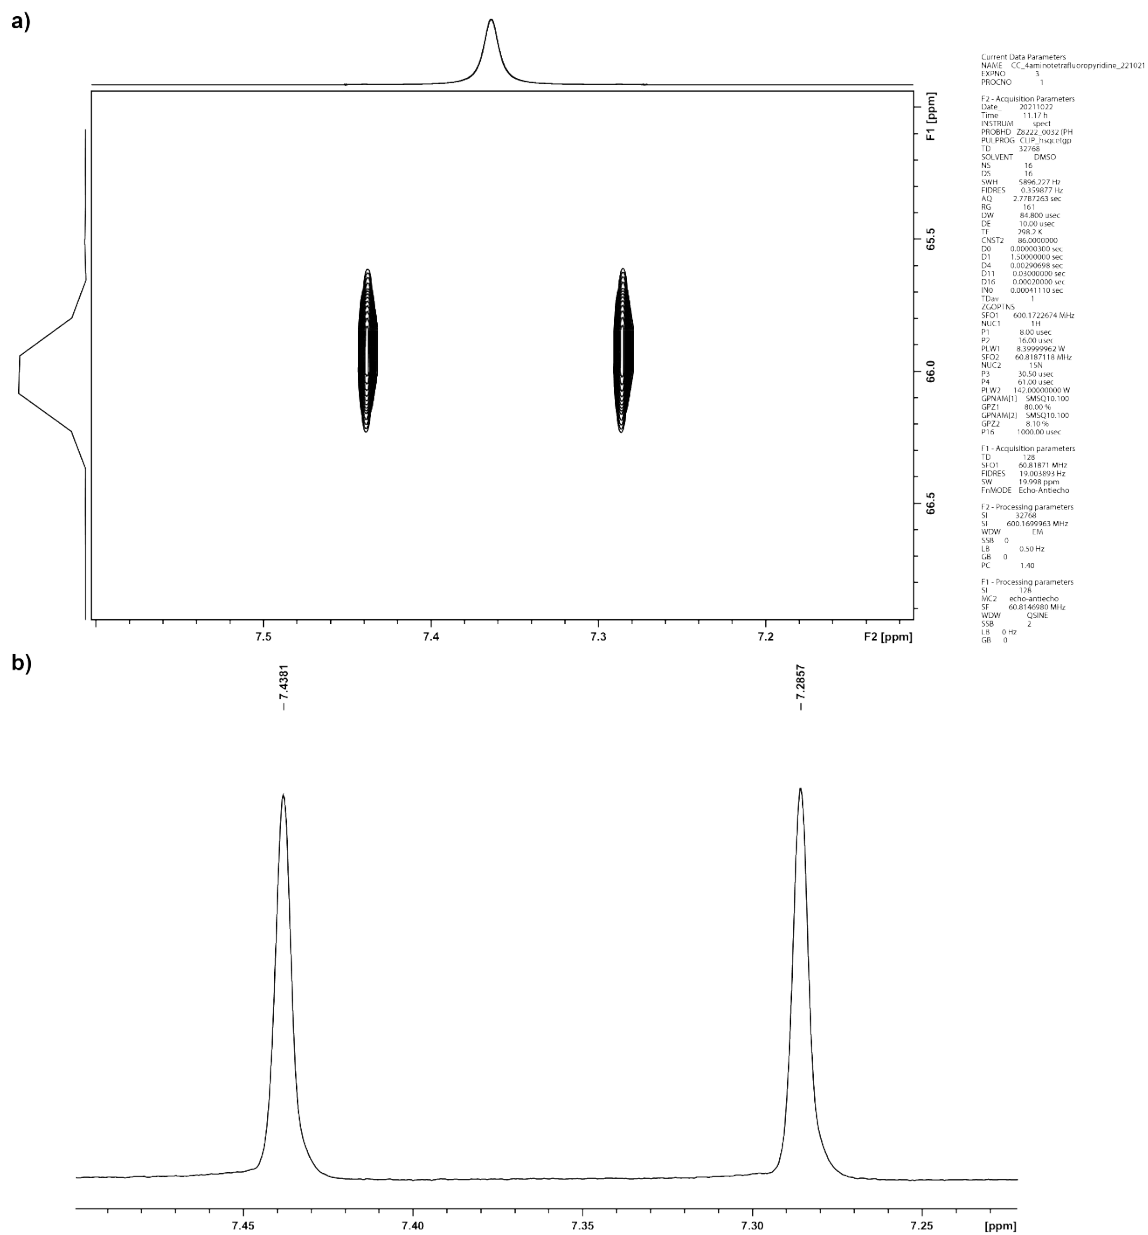

Figure S43.  $^1\text{H}$ - $^{15}\text{N}$  CLIP-HSQC contour map (a) and slice (b) for starting material 2,3,5,6-fluoro-4-aminopyridine in  $\text{DMSO-}d_6$ , obtained at 600 MHz ( $^1\text{H}$ ).

### Computational details – implicit solvation

Table S1. Theoretical  $J$  coupling values (Hz) calculated at PBE0(40%HF)/EPR-III level of theory with geometries optimised at M06-2X/aug-cc-pVDZ level of theory, and corresponding energies and population at the conformational equilibrium.

| Confor | $\Delta G$ (kcal mol <sup>-1</sup> ) | Population | $^3J_{H1H2}$ | $^3J_{H1H7}$ | $^3J_{H2H8}$ | $J_{H8F10}$ | $J_{H8F14}$ |
|--------|--------------------------------------|------------|--------------|--------------|--------------|-------------|-------------|
| A1     | 0.00                                 | 46%        | 9.3          | 1.2          | 6.3          | -3.9        | -           |
| A2     | 0.37                                 | 25%        | 9.6          | 14.7         | 0.7          | -1.4        | -           |
| A3     | 0.63                                 | 16%        | 9.5          | 1.1          | 0.7          | -1.4        | -           |
| A4     | 0.73                                 | 13%        | 9.4          | -0.2         | 12.5         | -2.6        | -           |
| B1     | 0.00                                 | 52%        | 9.1          | 0.2          | 11.4         | -2.6        | -           |
| B2     | 0.67                                 | 17%        | 9.3          | 1.6          | 8.5          | -3.5        | -           |
| B3     | 0.97                                 | 10%        | 9.6          | 0.9          | 3.7          | -2.7        | -           |
| B4     | 1.04                                 | 9%         | 9.7          | 14.8         | 3.2          | -2.6        | -           |
| B5     | 1.17                                 | 7%         | 9.6          | 14.7         | 11.2         | -3.5        | -           |
| B6     | 1.40                                 | 5%         | 9.5          | 1.1          | 9.0          | -3.6        | -           |
| C1     | 0.00                                 | 25%        | 9.1          | 0.5          | 10.9         | -2.3        | -3.4        |
| C2     | 0.01                                 | 25%        | 9.5          | 0.7          | 8.3          | -3.7        | -2.8        |
| C3     | 0.15                                 | 20%        | 9.6          | 14.7         | 8.0          | -2.8        | -3.7        |
| C4     | 0.20                                 | 18%        | 9.6          | 14.5         | 10.5         | -2.4        | -4.1        |
| C5     | 0.46                                 | 12%        | 9.4          | 1.4          | 11.2         | -4.1        | -2.4        |

Table S2. Contributions from spin-dipole (SD), paramagnetic spin-orbital (PSO), diamagnetic spin-orbital (DSO) and Fermi contact (FC) mechanisms to  $J_{H8F}$  coupling. The values are averaged over 32 MD configurations.

| $J$ -coupling     | 1    | 2    | 3    |
|-------------------|------|------|------|
| $^{SD}J_{H8F}$    | -0.5 | -0.3 | -0.3 |
| $^{PSO}J_{H8F}^a$ | -2.6 | -3.2 | -1.6 |
| $^{DSO}J_{H8F}^a$ | 2.1  | 2.6  | 1.0  |
| $^{FC}J_{H8F}$    | -0.9 | -1.1 | -1.1 |
| Total $J_{H8F}^b$ | -1.9 | -2.0 | -2.0 |

<sup>a</sup>Only the sum PSO+DSO is physically meaningful.

$$^b \text{Total } J_{H8F} = ^{SD}J_{H8F} + ^{PSO}J_{H8F} + ^{DSO}J_{H8F} + ^{FC}J_{H8F}$$

Table S3. *J*-coupling values calculated at PBE0(40%HF)/EPR-III level of theory for minimised geometries with OPLS force field.

| <i>J</i>                      | <sup>a</sup> OPLS <sup>bare</sup> |      |      | <sup>b</sup> OPLS <sup>impl</sup> |      |      | <sup>c</sup> OPLS <sup>full</sup> |      |      | <sup>d</sup> Exp. |      |     |
|-------------------------------|-----------------------------------|------|------|-----------------------------------|------|------|-----------------------------------|------|------|-------------------|------|-----|
|                               | 1                                 | 2    | 3    | 1                                 | 2    | 3    | 1                                 | 2    | 3    | 1                 | 2    | 3   |
| H <sub>1</sub> H <sub>2</sub> | 7.4                               | 8.0  | 7.9  | 7.5                               | 8.1  | 8.0  | 7.8                               | 8.6  | 8.4  | 8.8               | 9.2  | 9.3 |
| H <sub>1</sub> H <sub>7</sub> | 4.3                               | 0.1  | -0.3 | 4.3                               | 0.1  | -0.3 | 4.5                               | 0.2  | *    | 5.1               | 6.0  | *   |
| H <sub>2</sub> H <sub>8</sub> | 11.0                              | 9.8  | 12.1 | 10.7                              | 9.5  | 11.5 | 10.4                              | 8.5  | 10.0 | 6.4               | 7.1  | 9.2 |
| H <sub>8</sub> F              | -1.7                              | -1.7 | -0.1 | -1.8                              | -1.7 | -0.4 | -1.6                              | -0.7 | *    | -2.3              | -2.2 | *   |

<sup>a</sup>All solvent molecules were removed and without implicit solvation.

<sup>b</sup>Solute embedded by implicit solvation model (SMD) using DMSO as solvent and all solvent molecules were removed.

<sup>c</sup>Solute solvated by the three explicit smallest number nearest-neighbour solvent molecules embedded by implicit solvation model (SMD) using DMSO as solvent to treat bulk effects.

<sup>d</sup>Experimental data measured in DMSO-*d*<sub>6</sub>.

\*Values could not be measured due to signal's linewidth.

**Compound 1 (*trans*-2-((2-fluorophenyl)amino)cyclohexan-1-ol)**

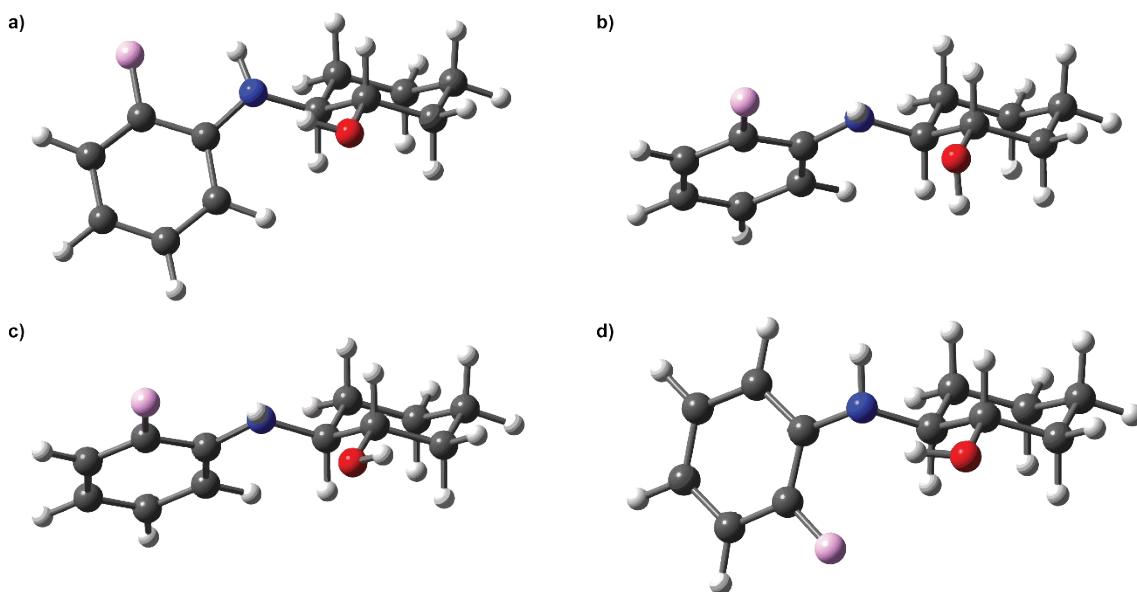

Figure S44. Geometry of conformers optimised at M06-2X/aug-cc-pVDZ level for compound 1: A1 (a), A2 (b), A3 (c) and A4 (d).

Geometry A1

O 1

|   |          |          |          |
|---|----------|----------|----------|
| H | 0.68379  | -1.77028 | 0.76648  |
| C | 1.55060  | -1.14534 | 0.56477  |
| C | 3.81636  | 0.40176  | 0.01465  |
| C | 1.37494  | 0.11314  | -0.03643 |
| C | 2.82714  | -1.61067 | 0.88899  |
| C | 3.96393  | -0.85094 | 0.62071  |
| C | 2.54741  | 0.84344  | -0.29354 |
| H | 2.92677  | -2.59016 | 1.35525  |
| H | 4.95590  | -1.22032 | 0.87314  |
| H | 4.67122  | 1.03557  | -0.21749 |
| N | 0.15507  | 0.63454  | -0.42397 |
| H | 0.18921  | 1.61325  | -0.68445 |
| F | 2.39269  | 2.06290  | -0.88337 |
| C | -1.11631 | 0.20971  | 0.15975  |
| C | -3.28114 | 0.98416  | 1.18882  |
| C | -3.22932 | -1.08689 | -0.24900 |
| C | -4.06238 | 0.11304  | 0.20372  |
| C | -1.91049 | -0.62667 | -0.84601 |
| C | -1.93834 | 1.42009  | 0.60099  |
| H | -3.10004 | 0.41358  | 2.11222  |
| H | -3.01256 | -1.74067 | 0.60969  |
| H | -4.33590 | 0.71614  | -0.67521 |
| H | -2.11023 | 0.01183  | -1.72487 |
| H | -2.10667 | 2.06761  | -0.27405 |
| H | -0.91198 | -0.41744 | 1.03902  |

|   |          |          |          |
|---|----------|----------|----------|
| H | -3.86908 | 1.86885  | 1.46421  |
| H | -3.77235 | -1.68334 | -0.99305 |
| H | -4.99717 | -0.23284 | 0.66247  |
| H | -1.36052 | 1.99769  | 1.33373  |
| O | -1.17416 | -1.77548 | -1.25307 |
| H | -0.33119 | -1.46254 | -1.60885 |

Geometry A2

O 1

|   |          |          |          |
|---|----------|----------|----------|
| H | -0.70802 | -1.90091 | 0.64580  |
| C | -1.57407 | -1.27940 | 0.43128  |
| C | -3.83905 | 0.28069  | -0.08490 |
| C | -1.39551 | 0.01026  | -0.09615 |
| C | -2.85514 | -1.77722 | 0.68603  |
| C | -3.99045 | -1.01192 | 0.43131  |
| C | -2.56679 | 0.74971  | -0.33144 |
| H | -2.95776 | -2.78248 | 1.09299  |
| H | -4.98559 | -1.40490 | 0.63039  |
| H | -4.69370 | 0.92195  | -0.29631 |
| N | -0.17121 | 0.56858  | -0.41993 |
| H | -0.17091 | 1.58176  | -0.37074 |
| F | -2.40694 | 2.00772  | -0.83021 |
| C | 1.07208  | -0.03504 | 0.04494  |
| C | 2.85339  | -1.76486 | -0.39348 |
| C | 3.47245  | 0.46610  | 0.59982  |
| C | 3.93451  | -0.68938 | -0.28941 |
| C | 2.14762  | 1.05000  | 0.12332  |

|   |         |          |          |   |         |          |          |
|---|---------|----------|----------|---|---------|----------|----------|
| C | 1.54125 | -1.15732 | -0.88596 | H | 3.17363 | -2.56332 | -1.07449 |
| H | 2.69536 | -2.22383 | 0.59456  | H | 4.22125 | 1.26785  | 0.62081  |
| H | 3.33975 | 0.10715  | 1.63322  | H | 4.86522 | -1.11380 | 0.10769  |
| H | 4.15591 | -0.30387 | -1.29609 | H | 0.76290 | -1.92464 | -0.97299 |
| H | 2.27291 | 1.48290  | -0.88044 | O | 1.72581 | 2.13870  | 0.94211  |
| H | 1.68317 | -0.72499 | -1.88783 | H | 1.66112 | 1.81391  | 1.85115  |
| H | 0.93744 | -0.44162 | 1.06466  |   |         |          |          |

Geometry A3

| O | 1        |          |          |
|---|----------|----------|----------|
| H | 0.71222  | -1.89991 | -0.65133 |
| C | 1.57726  | -1.27779 | -0.43473 |
| C | 3.83998  | 0.28443  | 0.08467  |
| C | 1.39657  | 0.01151  | 0.09298  |
| C | 2.85915  | -1.77436 | -0.68758 |
| C | 3.99343  | -1.00807 | -0.43119 |
| C | 2.56689  | 0.75212  | 0.32949  |
| H | 2.96324  | -2.77944 | -1.09464 |
| H | 4.98921  | -1.40012 | -0.62889 |
| H | 4.69366  | 0.92667  | 0.29702  |
| N | 0.17156  | 0.56837  | 0.41618  |
| H | 0.17009  | 1.58129  | 0.36605  |
| F | 2.40525  | 2.01009  | 0.82804  |
| C | -1.07040 | -0.03899 | -0.05167 |
| C | -2.85133 | -1.77079 | 0.39657  |
| C | -3.46739 | 0.44971  | -0.61164 |
| C | -3.93278 | -0.69562 | 0.28844  |
| C | -2.14709 | 1.03669  | -0.12701 |
| C | -1.53645 | -1.16151 | 0.88078  |
| H | -2.69734 | -2.23623 | -0.58901 |
| H | -3.32305 | 0.08586  | -1.63988 |
| H | -4.15239 | -0.30315 | 1.29283  |
| H | -2.28085 | 1.45835  | 0.88462  |
| H | -1.67220 | -0.73113 | 1.88416  |
| H | -0.93425 | -0.44009 | -1.07154 |
| H | -3.16906 | -2.56455 | 1.08423  |
| H | -4.22097 | 1.24896  | -0.64317 |
| H | -4.86426 | -1.12211 | -0.10442 |
| H | -0.75749 | -1.92863 | 0.96193  |
| O | -1.66638 | 2.05578  | -1.00380 |
| H | -2.34073 | 2.74466  | -1.05775 |

Geometry A4

| O | 1        |          |          |
|---|----------|----------|----------|
| H | 1.90716  | -1.59203 | 1.91517  |
| C | 2.29149  | -0.98326 | 1.09620  |
| C | 3.25465  | 0.57038  | -1.00938 |
| C | 1.44715  | -0.01441 | 0.53758  |
| C | 3.59109  | -1.17046 | 0.62540  |
| C | 4.07454  | -0.40311 | -0.43431 |
| C | 1.97684  | 0.74932  | -0.50955 |
| H | 4.22355  | -1.92933 | 1.08408  |
| H | 5.08455  | -0.55213 | -0.81206 |
| H | 3.59876  | 1.20213  | -1.82709 |
| N | 0.15328  | 0.23518  | 1.02997  |
| H | 0.00496  | -0.30913 | 1.87874  |
| F | 1.20813  | 1.73599  | -1.04002 |
| C | -0.97442 | -0.00403 | 0.10727  |
| C | -2.46889 | -1.68593 | -1.02702 |
| C | -3.40981 | 0.50965  | -0.22169 |
| C | -3.69594 | -0.97482 | -0.45347 |
| C | -2.20178 | 0.69677  | 0.68190  |
| C | -1.25254 | -1.48948 | -0.12098 |
| H | -2.24627 | -1.27643 | -2.02414 |
| H | -3.20006 | 1.00430  | -1.18211 |
| H | -3.97390 | -1.44605 | 0.50156  |
| H | -2.41494 | 0.24584  | 1.66958  |
| H | -1.43742 | -1.96272 | 0.85652  |
| H | -0.73222 | 0.47792  | -0.84840 |
| H | -2.67230 | -2.75689 | -1.15390 |
| H | -4.27658 | 1.01078  | 0.22818  |
| H | -4.55236 | -1.08713 | -1.13028 |
| H | -0.36146 | -1.96469 | -0.55251 |
| O | -1.95476 | 2.08808  | 0.84077  |
| H | -1.05391 | 2.15694  | 1.18915  |

Compound 2 (*trans*-2-((3-fluoropyridin-4-yl)amino)cyclohexan-1-ol)

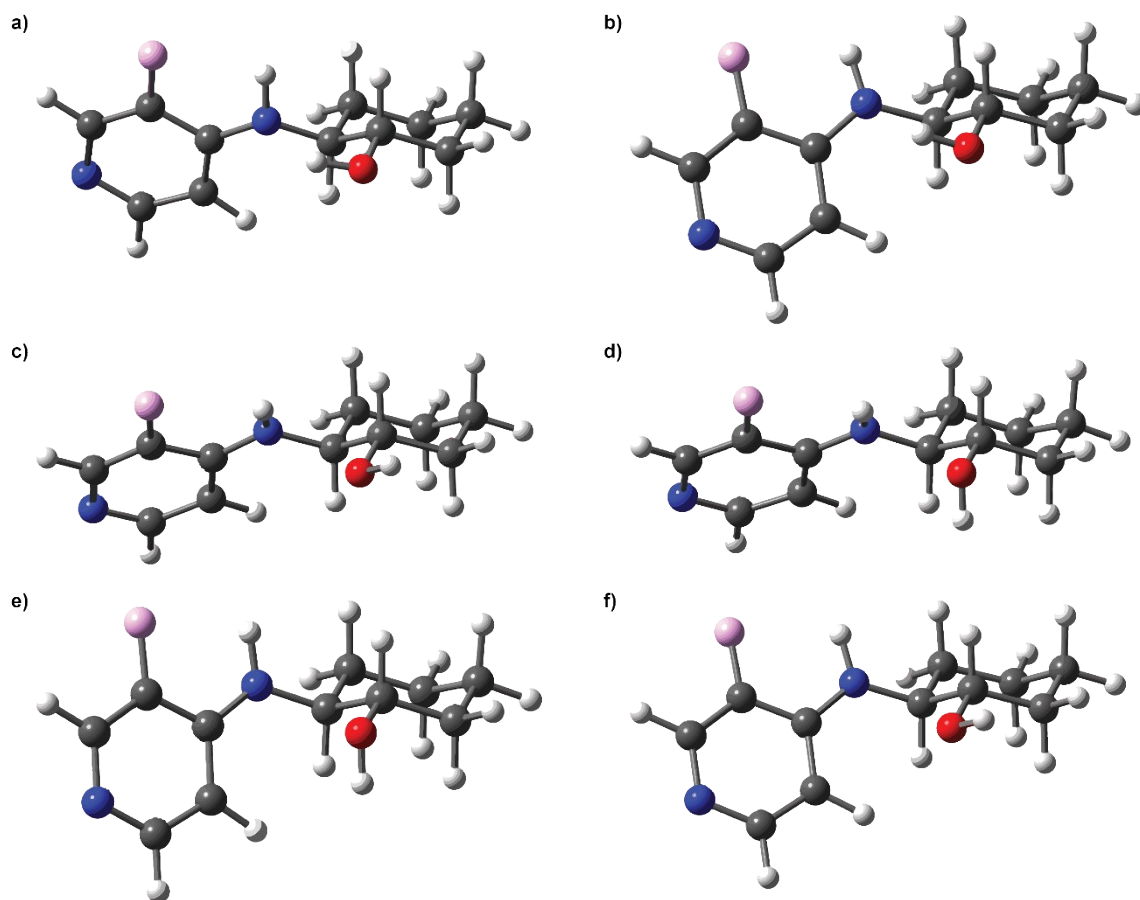

Figure S45. Geometry of conformers optimised at M06-2X/aug-cc-pVDZ level for compound 2: B1 (a), B2 (b), B3 (c), B4 (d), B5 (e) and B6 (f).



Geometry B1

| O 1 |          |          |          |
|-----|----------|----------|----------|
| C   | 2.19536  | 1.00382  | 0.28425  |
| C   | 3.86915  | -0.68035 | -0.55614 |
| C   | 1.41467  | -1.05165 | -0.95056 |
| C   | 2.76020  | -1.72508 | -0.68519 |
| C   | 1.08374  | -0.03416 | 0.14324  |
| C   | 3.53590  | 0.33345  | 0.53878  |
| H   | 3.98665  | -0.15654 | -1.51693 |
| H   | 1.44741  | -0.51998 | -1.91386 |
| H   | 2.69758  | -2.30685 | 0.24707  |
| H   | 0.99095  | -0.54057 | 1.11330  |
| H   | 3.48367  | -0.17419 | 1.51361  |
| H   | 2.24735  | 1.57585  | -0.66051 |
| H   | 4.82759  | -1.16504 | -0.33211 |
| H   | 0.60719  | -1.79286 | -1.01125 |
| H   | 2.98961  | -2.43000 | -1.49426 |
| H   | 4.31089  | 1.10717  | 0.60785  |
| N   | -0.16796 | 0.67519  | -0.11266 |
| H   | -0.12851 | 1.34025  | -0.88032 |
| O   | 1.93164  | 1.89124  | 1.36488  |
| H   | 1.01253  | 2.17965  | 1.28116  |
| C   | -1.38931 | 0.08723  | 0.06462  |
| N   | -4.01684 | -0.95647 | 0.41896  |
| C   | -1.63096 | -1.08412 | 0.80368  |
| C   | -2.54012 | 0.67980  | -0.48098 |
| C   | -3.80046 | 0.15864  | -0.29651 |
| C   | -2.93710 | -1.54371 | 0.94758  |
| H   | -0.81654 | -1.63818 | 1.26296  |
| H   | -4.65806 | 0.66198  | -0.74494 |
| H   | -3.11624 | -2.45153 | 1.52510  |
| F   | -2.37866 | 1.80964  | -1.21517 |

Geometry B2

| O 1 |          |          |          |
|-----|----------|----------|----------|
| C   | -1.84142 | -0.60860 | -0.85003 |
| C   | -4.07234 | 0.07090  | 0.07776  |
| C   | -2.00570 | 1.39687  | 0.65416  |
| C   | -3.37391 | 0.91980  | 1.14049  |
| C   | -1.13309 | 0.21613  | 0.22890  |
| C   | -3.19029 | -1.10125 | -0.35329 |
| H   | -4.29567 | 0.69844  | -0.79824 |
| H   | -2.13036 | 2.06851  | -0.20982 |
| H   | -3.24193 | 0.32142  | 2.05454  |
| H   | -0.95950 | -0.43183 | 1.09859  |
| H   | -3.01936 | -1.77683 | 0.49872  |
| H   | -1.99022 | 0.04535  | -1.72719 |
| H   | -5.02995 | -0.30446 | 0.45978  |
| H   | -1.48587 | 1.96035  | 1.43891  |
| H   | -3.99328 | 1.78588  | 1.40561  |
| H   | -3.67254 | -1.68345 | -1.14858 |
| N   | 0.15696  | 0.69857  | -0.24895 |
| H   | 0.16956  | 1.62445  | -0.65992 |
| O   | -1.06578 | -1.74195 | -1.22603 |
| H   | -0.22230 | -1.42189 | -1.57249 |
| C   | 1.36353  | 0.14916  | 0.04352  |
| N   | 3.97871  | -0.86941 | 0.56502  |
| C   | 1.56989  | -1.09521 | 0.67096  |
| C   | 2.54820  | 0.82538  | -0.30433 |
| C   | 3.79782  | 0.31536  | -0.04201 |
| C   | 2.86900  | -1.53756 | 0.90125  |
| H   | 0.73120  | -1.72055 | 0.96451  |
| H   | 4.67927  | 0.88880  | -0.33245 |
| H   | 3.01653  | -2.50200 | 1.38929  |
| F   | 2.42566  | 2.03038  | -0.91887 |

Geometry B3

|     |          |          |          |
|-----|----------|----------|----------|
| O 1 |          |          |          |
| C   | -2.13937 | 1.03881  | -0.15445 |
| C   | -3.93511 | -0.66454 | 0.34116  |
| C   | -1.53299 | -1.15392 | 0.88895  |
| C   | -2.86648 | -1.75263 | 0.44476  |
| C   | -1.07648 | -0.04935 | -0.06994 |
| C   | -3.47595 | 0.45334  | -0.59542 |
| H   | -4.12437 | -0.24757 | 1.34180  |
| H   | -1.63580 | -0.71181 | 1.89103  |
| H   | -2.74015 | -2.23649 | -0.53582 |
| H   | -0.94905 | -0.46739 | -1.08174 |
| H   | -3.35688 | 0.06291  | -1.61714 |
| H   | -2.24877 | 1.48844  | 0.84856  |
| H   | -4.88166 | -1.08581 | -0.01977 |
| H   | -0.75848 | -1.92788 | 0.95249  |
| H   | -3.17871 | -2.53009 | 1.15314  |
| H   | -4.22070 | 1.26055  | -0.63133 |
| N   | 0.18252  | 0.54828  | 0.35502  |
| H   | 0.16942  | 1.53330  | 0.58919  |
| O   | -1.66595 | 2.02571  | -1.06865 |
| H   | -2.34618 | 2.70646  | -1.14798 |
| C   | 1.39412  | 0.01286  | 0.06757  |
| N   | 4.01320  | -0.99734 | -0.44522 |
| C   | 1.60667  | -1.25264 | -0.51384 |
| C   | 2.57414  | 0.72139  | 0.36176  |
| C   | 3.82601  | 0.21412  | 0.10618  |
| C   | 2.90794  | -1.69140 | -0.74002 |
| H   | 0.77118  | -1.89192 | -0.78707 |
| H   | 4.70465  | 0.81062  | 0.35585  |
| H   | 3.06136  | -2.67300 | -1.19084 |
| F   | 2.44408  | 1.95459  | 0.91554  |

Geometry B4

|     |          |          |          |
|-----|----------|----------|----------|
| O 1 |          |          |          |
| C   | 2.14406  | 1.05151  | 0.13820  |
| C   | 3.93449  | -0.67022 | -0.33253 |
| C   | 1.53313  | -1.15439 | -0.88541 |
| C   | 2.86108  | -1.75411 | -0.42704 |
| C   | 1.07807  | -0.04337 | 0.06646  |
| C   | 3.48156  | 0.46958  | 0.58118  |
| H   | 4.13141  | -0.27002 | -1.33854 |
| H   | 1.64569  | -0.71510 | -1.88784 |
| H   | 2.72679  | -2.22517 | 0.55875  |
| H   | 0.95638  | -0.46043 | 1.08139  |
| H   | 3.37042  | 0.09619  | 1.61203  |
| H   | 2.24765  | 1.49497  | -0.86365 |
| H   | 4.87677  | -1.09153 | 0.03956  |
| H   | 0.75740  | -1.92667 | -0.95368 |
| H   | 3.17367  | -2.54202 | -1.12358 |
| H   | 4.22454  | 1.27665  | 0.59880  |
| N   | -0.18170 | 0.55266  | -0.35538 |
| H   | -0.17166 | 1.54643  | -0.54994 |
| O   | 1.73130  | 2.12715  | 0.97564  |
| H   | 1.67603  | 1.79041  | 1.88090  |
| C   | -1.39286 | 0.01231  | -0.06866 |
| N   | -4.00952 | -1.00724 | 0.43402  |
| C   | -1.60273 | -1.25937 | 0.49905  |
| C   | -2.57362 | 0.72338  | -0.35233 |
| C   | -3.82477 | 0.21127  | -0.10221 |
| C   | -2.90336 | -1.70301 | 0.72060  |
| H   | -0.76618 | -1.89985 | 0.76614  |
| H   | -4.70448 | 0.80936  | -0.34408 |
| H   | -3.05519 | -2.68998 | 1.16004  |
| F   | -2.44570 | 1.96337  | -0.89064 |

Geometry B5

| O | 1        |          |          |
|---|----------|----------|----------|
| C | 1.71191  | -0.50908 | 0.88549  |
| C | 4.06031  | -0.02740 | 0.10174  |
| C | 2.12421  | 1.29639  | -0.81781 |
| C | 3.50151  | 0.70649  | -1.11657 |
| C | 1.14813  | 0.21930  | -0.34187 |
| C | 3.08410  | -1.10096 | 0.58298  |
| H | 4.23152  | 0.69547  | 0.91376  |
| H | 2.21030  | 2.05978  | -0.02840 |
| H | 3.41737  | 0.00196  | -1.95776 |
| H | 1.01326  | -0.51261 | -1.14988 |
| H | 2.96599  | -1.87084 | -0.19723 |
| H | 1.79889  | 0.22526  | 1.70049  |
| H | 5.02945  | -0.48304 | -0.13696 |
| H | 1.70619  | 1.78630  | -1.70577 |
| H | 4.18563  | 1.50529  | -1.42912 |
| H | 3.45939  | -1.59881 | 1.48606  |
| N | -0.14274 | 0.82492  | -0.05760 |
| H | -0.12394 | 1.65316  | 0.52680  |
| O | 0.80600  | -1.49381 | 1.37133  |
| H | 0.73925  | -2.19027 | 0.70364  |
| C | -1.34405 | 0.20831  | -0.18335 |
| N | -3.97023 | -0.89365 | -0.43066 |
| C | -1.58406 | -1.02190 | -0.82795 |
| C | -2.50420 | 0.82779  | 0.31860  |
| C | -3.75824 | 0.27842  | 0.19000  |
| C | -2.88458 | -1.50521 | -0.92135 |
| H | -0.77244 | -1.60300 | -1.25726 |
| H | -4.61695 | 0.80812  | 0.60513  |
| H | -3.05555 | -2.45738 | -1.42571 |
| F | -2.35287 | 2.01993  | 0.95333  |

Geometry B6

| O | 1        |          |          |
|---|----------|----------|----------|
| C | -1.78690 | -0.62919 | -0.81277 |
| C | -4.07310 | 0.06612  | -0.01785 |
| C | -2.04141 | 1.39432  | 0.65299  |
| C | -3.43198 | 0.92234  | 1.07349  |
| C | -1.13250 | 0.22313  | 0.27355  |
| C | -3.16470 | -1.11055 | -0.37202 |
| H | -4.23925 | 0.68238  | -0.91434 |
| H | -2.12588 | 2.06303  | -0.21826 |
| H | -3.34941 | 0.33065  | 1.99761  |
| H | -0.97566 | -0.41033 | 1.15767  |
| H | -3.03713 | -1.76329 | 0.50503  |
| H | -1.88737 | -0.00223 | -1.71607 |
| H | -5.05318 | -0.30210 | 0.31026  |
| H | -1.56151 | 1.96332  | 1.45866  |
| H | -4.06154 | 1.79227  | 1.29915  |
| H | -3.60474 | -1.71628 | -1.17665 |
| N | 0.15743  | 0.74481  | -0.14849 |
| H | 0.15680  | 1.64442  | -0.61344 |
| O | -0.90972 | -1.71943 | -1.08226 |
| H | -1.32345 | -2.27266 | -1.75682 |
| C | 1.36189  | 0.16965  | 0.07288  |
| N | 3.98895  | -0.86779 | 0.50540  |
| C | 1.58232  | -1.07677 | 0.69254  |
| C | 2.54038  | 0.83601  | -0.31483 |
| C | 3.79489  | 0.31740  | -0.09646 |
| C | 2.88449  | -1.52704 | 0.87959  |
| H | 0.74799  | -1.69767 | 1.00432  |
| H | 4.66935  | 0.88492  | -0.41826 |
| H | 3.04190  | -2.49275 | 1.36247  |
| F | 2.40621  | 2.04446  | -0.92313 |

Compound 3 (*trans*-2-((perfluoropyridin-4-yl)amino)cyclohexan-1-ol)

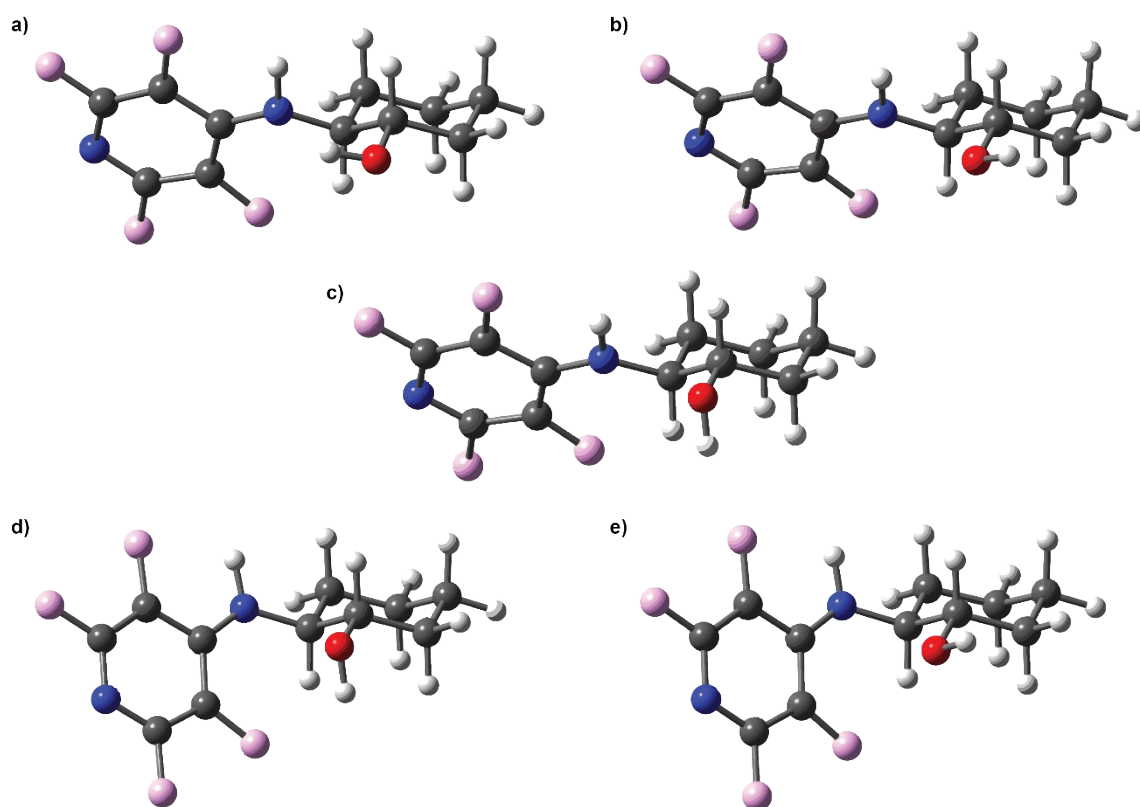

Figure S46. Geometry of conformers optimised at M06-2X/aug-cc-pVDZ level for compound 3: C1 (a), C2 (b), C3 (c), C4 (d) and C5 (e).

Geometry C1

| O 1 |          |          |          |
|-----|----------|----------|----------|
| C   | -1.63169 | -0.04545 | 0.11804  |
| C   | -3.21883 | 1.31573  | -1.28337 |
| C   | -4.10251 | -0.22724 | 0.49783  |
| C   | -4.36439 | 0.38888  | -0.87638 |
| C   | -2.77508 | -0.96857 | 0.53497  |
| C   | -1.88806 | 0.56609  | -1.25969 |
| H   | -3.16935 | 2.16429  | -0.58433 |
| H   | -4.07057 | 0.56426  | 1.26146  |
| H   | -4.46561 | -0.41202 | -1.62425 |
| H   | -2.80825 | -1.81554 | -0.17464 |
| H   | -1.90372 | -0.24800 | -2.00033 |
| H   | -1.55592 | 0.73998  | 0.87730  |
| H   | -3.39425 | 1.72776  | -2.28497 |
| H   | -4.90248 | -0.92484 | 0.77529  |
| H   | -5.31346 | 0.93891  | -0.85921 |
| H   | -1.05566 | 1.23271  | -1.52123 |
| O   | -2.58754 | -1.45782 | 1.85794  |
| H   | -1.69647 | -1.82771 | 1.91520  |
| N   | -0.39349 | -0.83472 | 0.14641  |
| C   | 0.85891  | -0.31897 | 0.08356  |
| N   | 3.56518  | 0.56774  | -0.01133 |
| C   | 1.94260  | -1.16128 | -0.24148 |
| C   | 1.23641  | 1.01043  | 0.35197  |
| C   | 2.56990  | 1.37031  | 0.28679  |
| C   | 3.22966  | -0.67944 | -0.26972 |
| F   | 0.33310  | 1.95270  | 0.67561  |
| H   | -0.47654 | -1.75433 | -0.28055 |
| F   | 1.68947  | -2.45090 | -0.52641 |
| F   | 4.22277  | -1.51964 | -0.58250 |
| F   | 2.88459  | 2.64485  | 0.54841  |

Geometry C2

| O 1 |          |          |          |
|-----|----------|----------|----------|
| C   | -1.62703 | -0.06951 | 0.14267  |
| C   | -3.18429 | 1.46909  | -1.10811 |
| C   | -4.10222 | -0.27554 | 0.44977  |
| C   | -4.34698 | 0.51544  | -0.83509 |
| C   | -2.77818 | -1.03119 | 0.40612  |
| C   | -1.86449 | 0.70246  | -1.15834 |
| H   | -3.13503 | 2.22507  | -0.30969 |
| H   | -4.07395 | 0.40814  | 1.31138  |
| H   | -4.44991 | -0.18162 | -1.68029 |
| H   | -2.80334 | -1.77084 | -0.41453 |
| H   | -1.88274 | -0.02178 | -1.98658 |
| H   | -1.57686 | 0.62342  | 0.99095  |
| H   | -3.33877 | 2.00289  | -2.05407 |
| H   | -4.91290 | -0.99662 | 0.62317  |
| H   | -5.28974 | 1.07074  | -0.75447 |
| H   | -1.02242 | 1.38292  | -1.33535 |
| O   | -2.51092 | -1.69322 | 1.63876  |
| H   | -3.26837 | -2.25743 | 1.84014  |
| N   | -0.38249 | -0.83868 | 0.09303  |
| C   | 0.86175  | -0.32889 | 0.06453  |
| N   | 3.56773  | 0.57787  | 0.00883  |
| C   | 1.23157  | 1.00167  | 0.35279  |
| C   | 1.95874  | -1.16206 | -0.25006 |
| C   | 3.24106  | -0.67051 | -0.26009 |
| C   | 2.56187  | 1.37002  | 0.30366  |
| F   | 1.71677  | -2.45267 | -0.54466 |
| H   | -0.46501 | -1.80877 | -0.19120 |
| F   | 0.31746  | 1.93006  | 0.69271  |
| F   | 2.86599  | 2.64407  | 0.58443  |
| F   | 4.24409  | -1.50263 | -0.56688 |

Geometry C3

|     |          |          |          |
|-----|----------|----------|----------|
| O 1 |          |          |          |
| C   | -1.62853 | -0.07817 | 0.14376  |
| C   | -3.17621 | 1.48219  | -1.08501 |
| C   | -4.10763 | -0.29418 | 0.43724  |
| C   | -4.34411 | 0.53066  | -0.82832 |
| C   | -2.78394 | -1.05056 | 0.38750  |
| C   | -1.86093 | 0.70924  | -1.14908 |
| H   | -3.12159 | 2.22464  | -0.27427 |
| H   | -4.08845 | 0.37251  | 1.31460  |
| H   | -4.45221 | -0.14783 | -1.68789 |
| H   | -2.80354 | -1.77641 | -0.43979 |
| H   | -1.88666 | -0.00778 | -1.98353 |
| H   | -1.58673 | 0.61095  | 0.99775  |
| H   | -3.32891 | 2.03273  | -2.02162 |
| H   | -4.91596 | -1.01977 | 0.59006  |
| H   | -5.28327 | 1.09031  | -0.73569 |
| H   | -1.01594 | 1.38674  | -1.32339 |
| O   | -2.58079 | -1.83023 | 1.55984  |
| H   | -2.61434 | -1.23330 | 2.32029  |
| N   | -0.38172 | -0.84197 | 0.09734  |
| C   | 0.86167  | -0.33000 | 0.06729  |
| N   | 3.56468  | 0.58362  | 0.00355  |
| C   | 1.96019  | -1.16196 | -0.24471 |
| C   | 1.22827  | 1.00228  | 0.35092  |
| C   | 2.55740  | 1.37432  | 0.29727  |
| C   | 3.24116  | -0.66695 | -0.25900 |
| F   | 0.31198  | 1.92786  | 0.69283  |
| H   | -0.46074 | -1.81696 | -0.16986 |
| F   | 1.72109  | -2.45443 | -0.53304 |
| F   | 4.24598  | -1.49765 | -0.56349 |
| F   | 2.85872  | 2.65014  | 0.57273  |

Geometry C4

|     |          |          |          |
|-----|----------|----------|----------|
| O 1 |          |          |          |
| C   | -1.70014 | -0.25444 | -0.40962 |
| C   | -4.11260 | -0.53369 | -1.08395 |
| C   | -3.51718 | 0.83059  | 0.94564  |
| C   | -4.55675 | -0.09308 | 0.31039  |
| C   | -2.14597 | 0.16681  | 0.99636  |
| C   | -2.73240 | -1.18748 | -1.04096 |
| H   | -4.07658 | 0.34248  | -1.74853 |
| H   | -3.43378 | 1.75738  | 0.35441  |
| H   | -4.68812 | -0.98080 | 0.94733  |
| H   | -2.19514 | -0.73920 | 1.61808  |
| H   | -2.77747 | -2.11190 | -0.44356 |
| H   | -1.59980 | 0.64011  | -1.03445 |
| H   | -4.83790 | -1.23682 | -1.51185 |
| H   | -3.81002 | 1.11200  | 1.96496  |
| H   | -5.52689 | 0.41658  | 0.25855  |
| H   | -2.39658 | -1.46097 | -2.04883 |
| O   | -1.17390 | 0.99628  | 1.62293  |
| H   | -1.16982 | 1.84600  | 1.16098  |
| N   | -0.41286 | -0.94629 | -0.37206 |
| C   | 0.81121  | -0.39918 | -0.23635 |
| N   | 3.49362  | 0.55028  | 0.00769  |
| C   | 1.91209  | -1.23160 | 0.06582  |
| C   | 1.16593  | 0.95414  | -0.41080 |
| C   | 2.48353  | 1.34272  | -0.27411 |
| C   | 3.18245  | -0.71950 | 0.17066  |
| F   | 0.24941  | 1.89296  | -0.71562 |
| H   | -0.46668 | -1.93243 | -0.13678 |
| F   | 1.68675  | -2.54556 | 0.25310  |
| F   | 4.18814  | -1.55447 | 0.46110  |
| F   | 2.77166  | 2.64013  | -0.44432 |

## Geometry C5

O 1

|   |          |          |          |
|---|----------|----------|----------|
| C | -1.70264 | -0.19570 | -0.43709 |
| C | -4.13293 | -0.37720 | -1.08998 |
| C | -3.48315 | 0.74710  | 1.06099  |
| C | -4.54380 | -0.09800 | 0.35565  |
| C | -2.12149 | 0.06450  | 1.00871  |
| C | -2.75630 | -1.03771 | -1.15440 |
| H | -4.10552 | 0.57031  | -1.64852 |
| H | -3.39631 | 1.72897  | 0.57164  |
| H | -4.66458 | -1.05203 | 0.89072  |
| H | -2.17975 | -0.91104 | 1.52257  |
| H | -2.79778 | -2.02804 | -0.67424 |
| H | -1.59490 | 0.76549  | -0.94869 |
| H | -4.87215 | -1.02281 | -1.58015 |
| H | -3.75565 | 0.92023  | 2.11141  |
| H | -5.51236 | 0.41636  | 0.38484  |
| H | -2.44242 | -1.18771 | -2.19457 |
| O | -1.09963 | 0.85832  | 1.60481  |
| H | -1.33879 | 1.01017  | 2.52775  |
| N | -0.42307 | -0.90458 | -0.49469 |
| C | 0.80508  | -0.37671 | -0.29817 |
| N | 3.48497  | 0.53456  | 0.06140  |
| C | 1.17721  | 0.97631  | -0.42938 |
| C | 1.88436  | -1.22948 | 0.01764  |
| C | 3.15661  | -0.73490 | 0.17921  |
| C | 2.49354  | 1.34538  | -0.23678 |
| F | 1.63973  | -2.54544 | 0.16334  |
| H | -0.48941 | -1.89645 | -0.28596 |
| F | 0.28714  | 1.92555  | -0.76104 |
| F | 2.80313  | 2.64291  | -0.36811 |
| F | 4.14272  | -1.58872 | 0.48352  |

## Computational details – implicit and explicit solvation

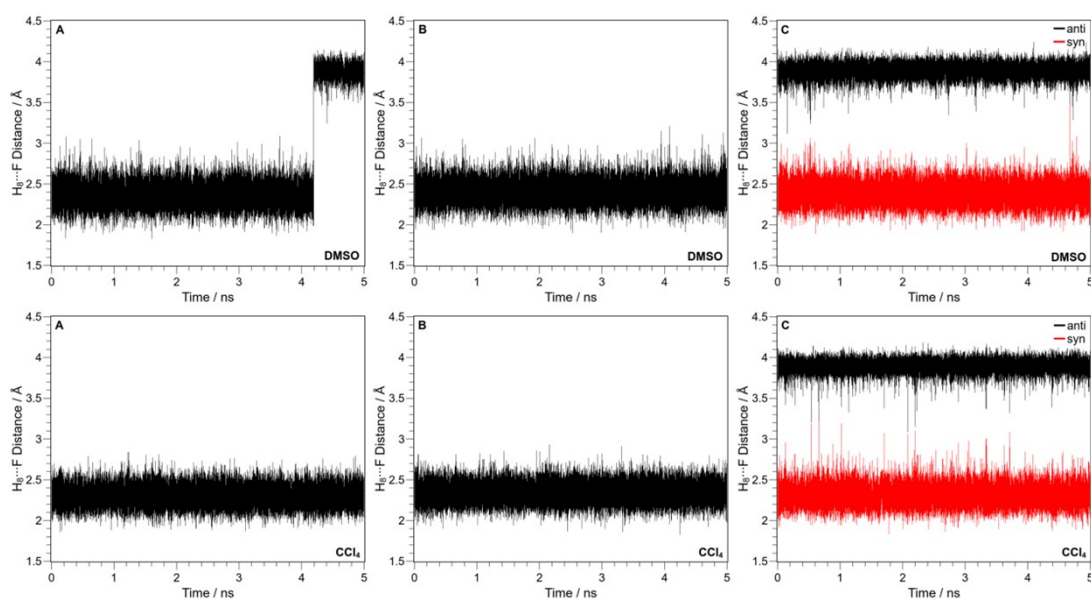

Figure S47. Time development of the H8...F distance throughout the MD production trajectory. For compound 3, the distances from H8 to both F10 (syn) and F14 (anti) were measured separately to show that in both solvents there is no variation of the dihedral angles, which would lead to a change in the positions of the F atoms.

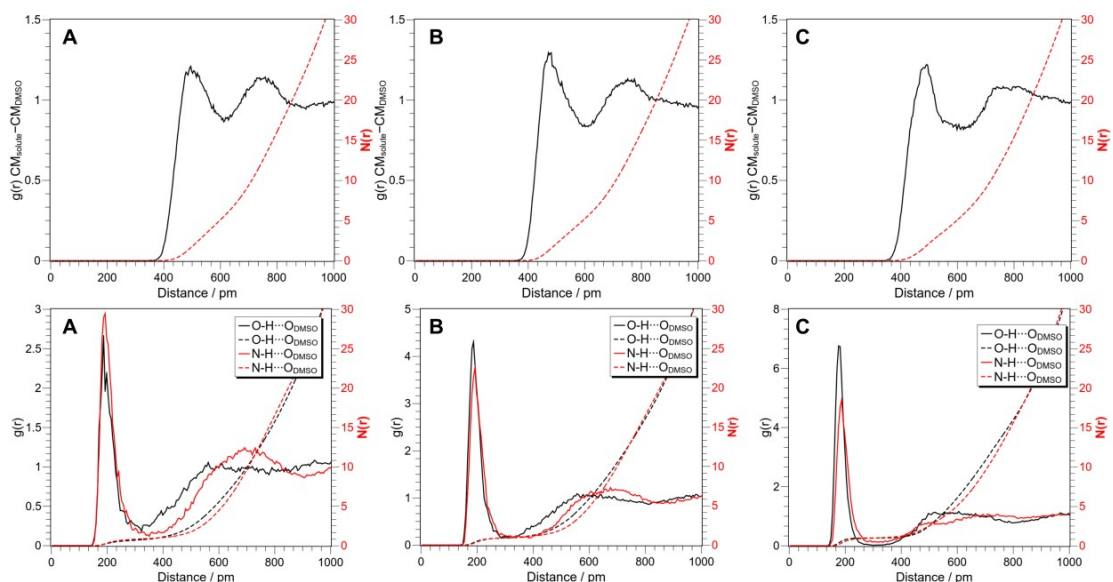

Figure S48. Top: Radial distribution function,  $g(r)$ , between centres of mass of compounds A, B, and C and solvent showing the first (peak starting at 3.5 Å) and second (peak starting at 6.0 Å) solvation shells; Bottom: Radial distribution functions,  $g(r)$ , and their integrations,  $N(r)$ , between hydrogens H7 and H8 of compounds A, B, and C and oxygen of solvent.



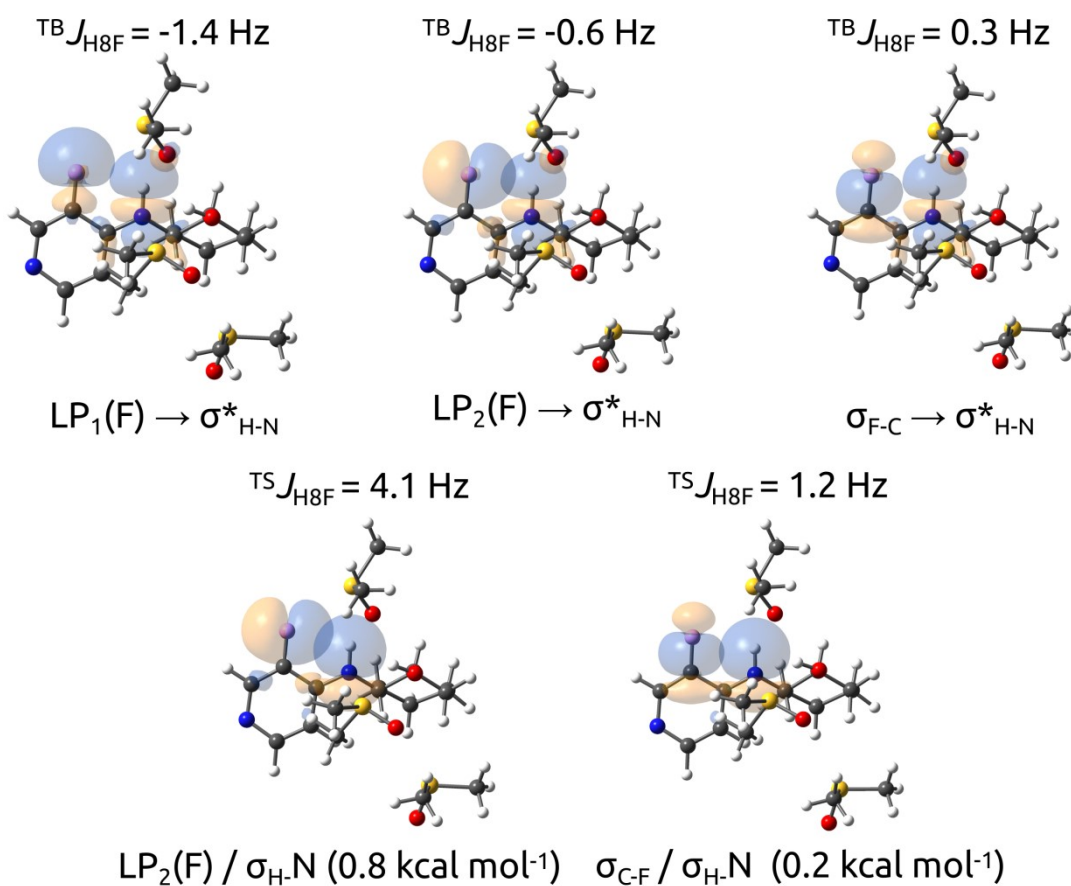

Figure S49. Main NJC interactions for the transmission pathway through-space ( ${}^{\text{TS}}J_{\text{H8F}}$ ) and through-bond ( ${}^{\text{TB}}J_{\text{H8F}}$ ) for compound **2**, where red=O; blue=N; grey=C; yellow=S; light blue=F; white=H.

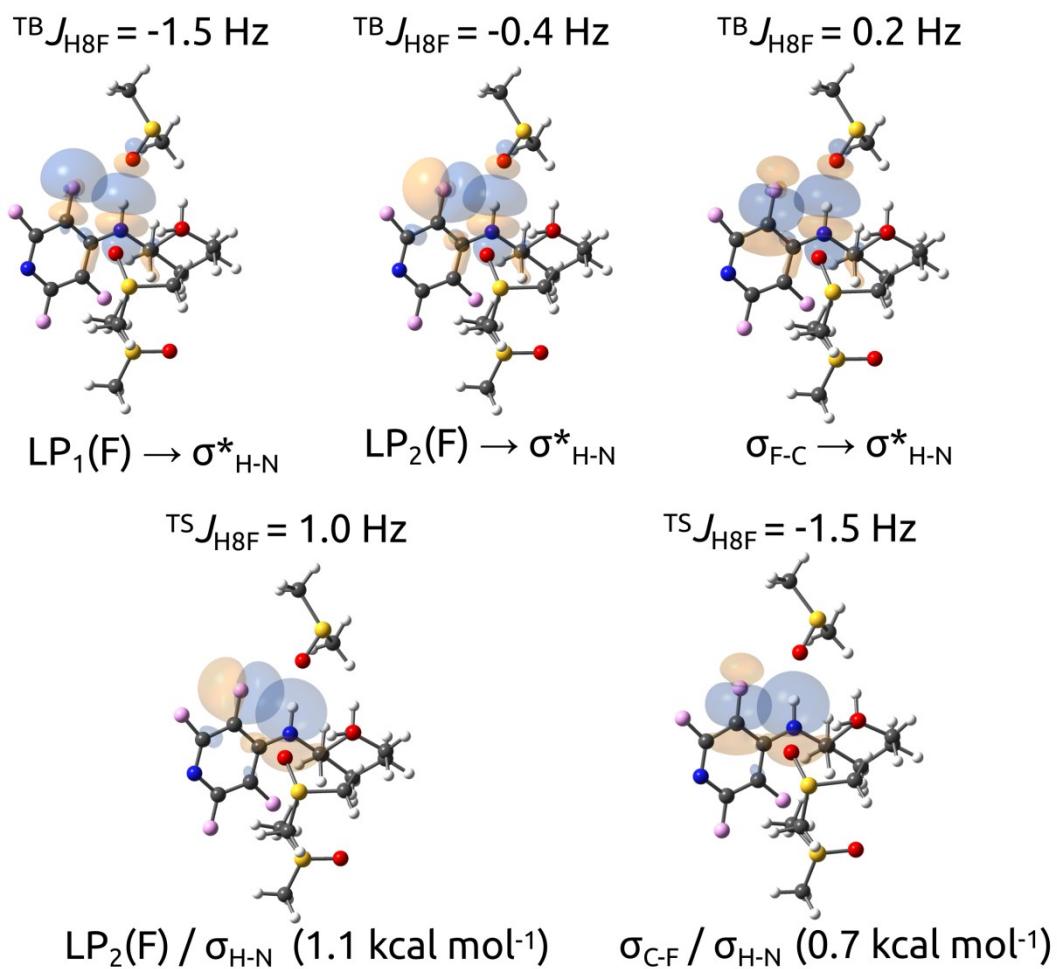

Figure S50. Main NJC interactions for the transmission pathway through-space ( ${}^{\text{TS}}J_{\text{H8F}}$ ) and through-bond ( ${}^{\text{TB}}J_{\text{H8F}}$ ) for compound **3**, where red=O; blue=N; grey=C; yellow=S; light blue=F; white=H.

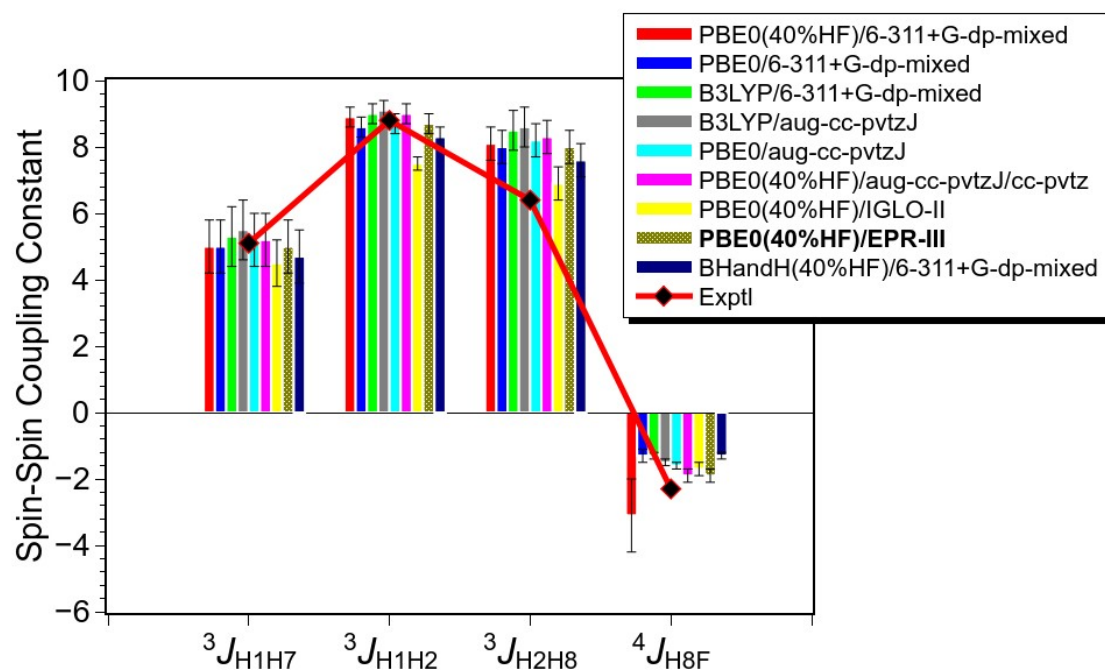

Figure S51. Levels of theory tested to calculate the  $J$ -couplings averaged over 32 MD configurations from production trajectory of compound 1, taking into account the implicit (SMD) and explicit (3 DMSO solvent molecules) solvation.

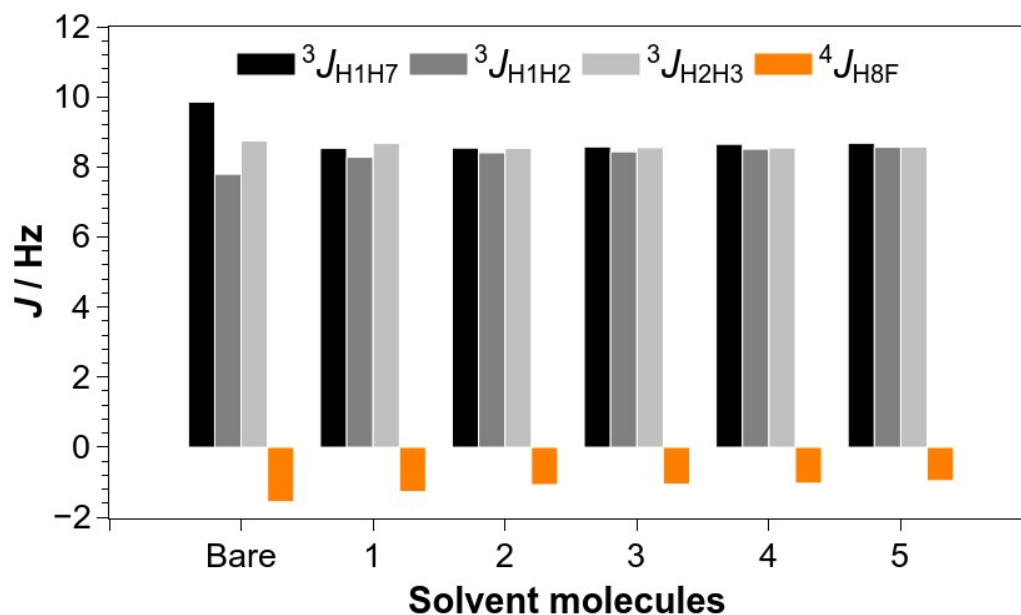

Figure S52.  $J$ -coupling dependence on the explicit nearest neighbouring (NN) solvent count for compound 1. All data are means corresponding to trajectory averages (32 configurations). The 'Bare' corresponds to structures wherein all solvent molecules were stripped and without implicit solvation, while the remaining counts (1–5) correspond to structures including the NN given number of explicit solvent molecules and implicit solvation via SMD.

**Averaged *J*-coupling over MD configurations solvated by 3 DMSO molecules**

**Compound 1 (*trans*-2-((2-fluorophenyl)amino)cyclohexan-1-ol)**

```
#Configuration JH1H7 JH1H2 JH2H8 JH8F#
0001 -0.490494 9.210510 10.545600 -3.728410
0002 14.777400 9.877320 7.400380 -1.751440
0003 8.936610 7.248510 12.281700 -1.932490
0004 2.719440 8.096620 5.880380 -0.772849
0005 3.816270 6.860520 9.710680 -1.280280
0006 3.396030 9.678050 6.823810 -1.614630
0007 -0.009980 6.804460 8.688640 -3.916140
0008 2.103380 11.504900 10.999100 -1.876540
0009 2.096640 9.897330 8.972120 1.159850
0010 0.475454 10.603500 12.724200 -1.538880
0011 11.976400 8.619730 4.789580 -2.047750
0012 6.190280 8.510260 7.320780 -3.589050
0013 0.470093 11.432100 11.254900 -1.823050
0014 3.619550 8.405570 9.377660 -2.283710
0015 1.357060 7.133460 5.178230 -1.257440
0016 7.919010 10.104900 5.394460 -1.620720
0017 3.467690 7.190400 3.395010 -0.657158
0018 11.902600 8.594780 7.206120 -1.476220
0019 2.526670 7.518270 0.789334 -1.781270
0020 4.390510 8.863280 9.391840 -0.798363
0021 4.977270 7.482860 1.510590 -1.391690
0022 1.163230 9.443340 8.469920 -1.899840
0023 2.622160 11.474900 8.472040 -2.037720
0024 6.321940 7.759200 6.005070 -1.936790
0025 9.127340 8.618580 10.445400 -1.536750
0026 3.197530 9.545390 8.135900 -1.666190
0027 2.181980 8.737810 5.484550 -2.700910
0028 14.417500 8.849720 13.031300 -2.271110
0029 -0.077980 5.217260 7.061860 -2.711580
0030 0.049605 10.188300 9.673170 -1.201990
0031 11.566800 6.382010 9.919190 -3.044660
0032 13.478200 9.212730 10.366600 -3.025540
```

== JH1H7 ==

```
#####  
#   Statistic Parameters   #  
#####  
N = 32  
sum = 160.666  
mean = 5.020818  
mean error = 0.807625  
std = 4.56861  
variance = 20.8722
```

== JH1H2 ==

```
#####  
#   Statistic Parameters   #  
#####  
N = 32  
sum = 279.067  
mean = 8.720830  
mean error = 0.26524  
std = 1.50042  
variance = 2.25127
```

== JH2H8 ==

```
#####  
#   Statistic Parameters   #  
#####  
N = 32  
sum = 256.7  
mean = 8.021879  
mean error = 0.520676  
std = 2.94539  
variance = 8.67531
```

== JH8F ==

```
#####  
#   Statistic Parameters   #  
#####  
N = 32  
sum = -60.0113  
mean = -1.875353  
mean error = 0.17139  
std = 0.969526  
variance = 0.93998
```

**Compound 2 (*trans*-2-((3-fluoropyridin-4-yl)amino)cyclohexan-1-ol)**

```
#Configuration JH1H7 JH1H2 JH2H8 JH8F#
0001 14.187200 6.379480 11.104500 -1.262520
0002 8.553420 6.176030 2.106370 -0.688670
0003 3.041640 8.151020 4.214440 -1.249630
0004 3.281580 10.362100 3.564680 -0.318929
0005 5.635310 9.157680 12.832100 -7.272320
0006 -0.179171 8.246270 6.048730 -1.383590
0007 8.685500 7.306900 5.960620 -1.771960
0008 0.471405 8.421220 6.899680 -0.580591
0009 11.159000 7.795550 13.486100 -2.433300
0010 6.211810 10.147900 12.180200 -0.651525
0011 15.420600 8.092850 12.477400 -3.194550
0012 2.064390 11.333800 6.530750 -0.998028
0013 -0.559975 12.368100 8.822900 -2.346760
0014 0.189940 8.456030 11.387400 -2.014890
0015 4.113320 9.106220 7.404100 -2.591680
0016 0.110255 7.229720 4.995530 -3.254470
0017 3.035480 4.950330 12.760700 -1.860780
0018 4.217070 8.799670 8.328520 -1.419750
0019 6.558520 9.766790 10.460200 -1.945080
0020 5.738570 10.687400 9.644980 -0.457803
0021 3.064540 9.373370 9.893440 -2.337870
0022 14.384100 9.679390 10.000100 -1.218980
0023 -0.309235 7.245510 11.021500 -1.727680
0024 11.566100 8.083630 9.149170 -1.590180
0025 5.252600 9.977360 5.351980 -1.288640
0026 0.704359 7.869410 9.581020 -4.337140
0027 1.154710 7.308420 7.592980 -2.849960
0028 8.905080 8.650610 2.291170 -0.848150
0029 14.166600 6.934530 13.664000 -2.646870
0030 11.712700 6.311770 8.022450 -1.287700
0031 18.553800 8.123600 11.937600 -3.296760
0032 11.109300 7.531720 8.959740 -3.256580
```

== JH1H7 ==

```
#####
```

```
# Statistic Parameters #
```

```
#####
```

```
N = 32
```

```
sum = 202.201
```

```
mean = 6.318766
```

mean error = 0.944796  
std = 5.34458  
variance = 28.5645

== JH1H2 ==

#####

# Statistic Parameters #

#####

N = 32

sum = 270.024

mean = 8.438262

mean error = 0.277696

std = 1.57089

variance = 2.46768

== JH2H8 ==

#####

# Statistic Parameters #

#####

N = 32

sum = 278.675

mean = 8.708595

mean error = 0.564654

std = 3.19417

variance = 10.2027

== JH8F ==

#####

# Statistic Parameters #

#####

N = 32

sum = -64.3833

mean = -2.011979

mean error = 0.238568

std = 1.34955

variance = 1.82128

**Compound 3 (*trans*-2-((perfluoropyridin-4-yl)amino)cyclohexan-1-ol)**

#Configuration JH1H7 JH1H2 JH2H8 JH8F10 JH8F14#

0001 4.060660 5.971540 4.732060 -2.188360 -2.263230

0002 -0.293406 7.759830 12.092500 -3.112940 -2.087670  
0003 0.464467 8.790290 9.682200 -1.424530 -2.401430  
0004 14.417500 8.053830 9.822940 -1.449540 -2.807440  
0005 -0.265573 9.479780 11.099100 -1.803220 -2.268090  
0006 15.276500 6.579460 10.392300 -2.999710 -2.622560  
0007 0.779608 10.726800 9.514050 -0.843970 -2.631760  
0008 11.449500 8.193530 13.627500 -2.484320 -2.323410  
0009 11.288600 7.884840 10.708100 -0.006170 -0.409293  
0010 13.913500 9.050390 5.267730 -1.898800 -3.523920  
0011 2.532310 7.413580 3.775670 -1.395440 -2.901760  
0012 -0.023744 7.562580 11.975100 -2.996120 -2.539830  
0013 4.741970 10.999100 6.749650 0.479245 -1.549950  
0014 7.954840 9.408710 7.443940 -0.903361 -2.609880  
0015 8.518420 6.831640 7.139630 0.299230 -0.904565  
0016 12.894100 10.178500 6.696280 -1.801600 -2.856650  
0017 5.025420 8.466300 8.578360 -1.380120 -3.031260  
0018 9.113410 10.243000 8.655890 -1.473920 -2.605480  
0019 4.969120 7.381170 9.261920 -0.864282 -2.714040  
0020 2.458980 9.743350 5.671690 -6.306400 -2.085400  
0021 2.910400 5.447110 7.035240 -0.578356 -1.951640  
0022 4.695130 7.920130 0.434320 2.932020 2.272620  
0023 1.048080 7.307140 5.737600 -2.405180 -2.829620  
0024 -0.259280 8.358220 9.052940 -4.942140 -2.111900  
0025 1.400680 9.545140 4.539260 -3.066700 -2.155070  
0026 0.512825 7.554150 8.299340 -1.959790 -2.116820  
0027 3.090610 8.177660 11.469100 -3.390030 -2.739570  
0028 -0.859410 8.805010 11.400000 -2.666760 -2.536740  
0029 0.948714 6.040500 10.325100 0.427512 -0.119022  
0030 10.499800 7.723780 9.636110 -3.046040 -2.227490  
0031 4.562250 8.626310 8.526660 -2.434650 -2.760880  
0032 2.178540 7.143980 10.432600 -3.296620 -2.947750

== JH1H7 ==

#####

# Statistic Parameters #

#####

N = 32

sum = 160.005

mean = 5.000141

variance = 23.8037

std = 4.8789

mean error = 0.862476

== JH1H2 ==



```
#####  
#   Statistic Parameters   #  
#####  
N = 32  
sum = 263.367  
mean = 8.230230  
variance = 1.80111  
std = 1.34205  
mean error = 0.237244
```

== JH2H8 ==

```
#####  
#   Statistic Parameters   #  
#####  
N = 32  
sum = 269.775  
mean = 8.430465  
variance = 7.86913  
std = 2.8052  
mean error = 0.495894
```

== JH8F10 ==

```
#####  
#   Statistic Parameters   #  
#####  
N = 32  
sum = -58.9811  
mean = -1.843158  
variance = 2.80576  
std = 1.67504  
mean error = 0.296108
```

== JH8F14 ==

```
#####  
#   Statistic Parameters   #  
#####  
N = 32  
sum = -69.3615  
mean = -2.167547  
variance = 1.13331  
std = 1.06457
```

mean error = 0.188191
